# Supplementary material
Source: PubMed Central journal article supplement (PMC3894304)
Supplement: NIHMS524273-supplement-1.pdf [file NIHMS524273-supplement-1.pdf]

**Appendix 1.** Quality rating scale assessment for all studies with prospective data.

1. Did the study include a theoretical framework?
2. Was the study powered to detect a non-trivial correlation?
3. Was the study design prospective in order to infer an influence of stress on PA?
4. Did the study include a control group comparison?
5. Was an objective measure of stress used? If experimental, was a manipulation check included for the stress condition?
6. Were the measures of stress reliable (e.g., pre-tested)?
7. Was an objective measure of physical activity/inactivity used? If the outcome is exercise intervention adherence/compliance, were participants monitored?
8. Were the measures of physical activity/inactivity reliable (e.g., pre-tested)?
9. Were statistically appropriate/acceptable methods of data analyses used to address the specific question of interest in the current study?

|                         | 1 | 2 | 3 | 4 | 5 | 6 | 7 | 8 | 9 | Rating <sup>a</sup> |
|-------------------------|---|---|---|---|---|---|---|---|---|---------------------|
| Allard et al., 2011     | X |   | X |   | X | X | X |   | X | 6                   |
| Bell et al., 2006       | X |   | X |   | X | X | X | X | X | 7                   |
| Brown et al., 1988      | X | X | X |   | X | X | X |   | X | 6                   |
| Brown et al., 2003      | X |   | X |   | X | X | X | X | X | 7                   |
| Brown et al., 2009      | X |   | X |   | X | X | X | X | X | 7                   |
| Budden & Sagarin, 2007  | X | X | X |   | X | X | X |   | X | 7                   |
| Burton et al., 1999     | X |   | X |   | X | X | X |   | X | 6                   |
| Burton et al., 2010     | X |   | X |   | X | X | X | X |   | 6                   |
| Castro et al., 2002     | X | X | X |   | X | X | X |   | X | 7                   |
| Chambers et al., 2009   | X |   | X |   | X | X | X | X | X | 7                   |
| Delahanty et al., 2006  |   | X | X |   | X | X | X | X | X | 7                   |
| Dobkin et al., 2005     | X | X | X |   | X | X | X |   | X | 7                   |
| Dobkin et al., 2006     | X | X | X |   | X | X | X |   | X | 7                   |
| Dougall et al., 2011    | X | X | X |   | X | X | X | X | X | 8                   |
| Dunton et al., 2009     |   | X | X |   | X | X | X |   | X | 6                   |
| Durrani et al., 2012    |   | X | X |   | X | X | X | X | X | 7                   |
| Grace et al., 2006      | X | X | X | X | X | X | X | X |   | 8                   |
| Griffin et al., 1993    |   | X | X |   | X | X | X | X | X | 7                   |
| Groeneveld et al., 2009 |   |   | X |   | X |   | X |   | X | 4                   |
| Ho et al., 2002         | X | X | X |   | X |   | X |   | X | 6                   |

|                             |   |   |   |   |   |   |   |   |   |   |
|-----------------------------|---|---|---|---|---|---|---|---|---|---|
| Hooper et al., 1995         |   | X | X |   | X |   | X | X | X | 6 |
| Hull et al., 2010           | X | X | X |   | X | X | X | X | X | 8 |
| Johnson-Kozlow et al., 2004 | X | X | X |   | X | X | X | X | X | 8 |
| Jones et al., 2007          | X | X | X |   | X | X | X |   | X | 8 |
| Jouper et al., 2009         | X | X | X |   | X | X | X | X | X | 8 |
| King et al., 1997           |   | X | X |   | X | X | X | X | X | 7 |
| LeardMann et al., 2011      |   |   | X |   | X | X | X | X | X | 6 |
| Lutz et al., 2007           |   | X | X |   | X | X | X | X | X | 7 |
| Lutz et al., 2010           |   | X | X |   | X | X | X |   | X | 6 |
| Macleod et al., 2001        |   |   | X |   | X | X | X |   | X | 5 |
| Miller et al., 2004         |   | X | X |   | X |   | X | X | X | 6 |
| Moen et al., 2011           | X | X | X | X | X | X | X |   | X | 8 |
| Oaten et al., 2005          | X | X | X | X | X | X | X |   | X | 8 |
| O'Connor et al., 2009       | X | X | X |   | X |   | X |   | X | 6 |
| Oman & King, 2000           | X | X | X |   | X | X | X | X | X | 8 |
| Payne et al., 2002          | X | X | X |   | X | X | X |   | X | 7 |
| Payne et al., 2005          | X | X | X |   | X | X | X |   | X | 7 |
| Payne et al., 2010          | X | X | X |   | X | X | X |   | X | 7 |
| Phongsavan et al., 2008     |   | X | X |   | X | X | X | X |   | 6 |
| Reynolds et al., 1990       |   |   | X |   | X | X | X | X | X | 6 |
| Rod et al., 2009            | X |   | X |   | X |   | X |   | X | 5 |
| Rodriguez et al., 2000      | X | X | X |   | X | X | X |   | X | 7 |
| Roemmich et al., 2003       |   | X | X | X | X | X | X | X | X | 8 |
| Sherman et al., 2009        |   | X | X |   | X | X | X |   | X | 6 |
| Smith et al., 2005          | X | X | X | X | X | X | X | X | X | 9 |
| Smith et al., 2008          | X |   | X |   | X | X | X |   | X | 6 |
| Sonnentag et al., 2009      | X | X | X |   | X | X | X |   | X | 7 |
| Steptoe et al., 1996        |   | X | X | X | X | X | X |   | X | 7 |
| Steptoe et al., 1998        |   | X | X |   | X | X | X |   | X | 6 |
| Twisk et al., 1999          | X | X | X |   | X | X | X |   | X | 7 |
| Stetson et al., 1997        |   | X | X |   | X | X | X | X | X | 8 |
| Urizar et al., 2005         | X | X | X |   | X | X | X | X | X | 8 |
| Vitaliano et al., 1998      | X | X | X | X | X | X | X |   | X | 8 |
| Wilcox et al., 2004         | X | X | X |   | X | X | X | X | X | 8 |
| Williams et al., 1995       |   |   | X |   | X | X | X | X | X | 6 |

<sup>a</sup> Rating is the total number of yes (“X”) responses.

Appendix 2. Cross-sectional (n = 100), retrospective (n = 4<sup>a</sup>) and qualitative (n = 9) studies investigating the effects of stress on indices of physical activity. See main text for full citations.

| Study                                                                 | Sample                                                                                                       | Participants (n) | Theoretical framework or model             | Study design    | Stress measure[s]                                                                         | Physical activity measure[s];<br>Data transformation                                                                                                                       | Significant findings, associations, effect sizes                                                                                                                                                                                                                                                                                                                        |
|-----------------------------------------------------------------------|--------------------------------------------------------------------------------------------------------------|------------------|--------------------------------------------|-----------------|-------------------------------------------------------------------------------------------|----------------------------------------------------------------------------------------------------------------------------------------------------------------------------|-------------------------------------------------------------------------------------------------------------------------------------------------------------------------------------------------------------------------------------------------------------------------------------------------------------------------------------------------------------------------|
| Ahola, 2012<br><br>Journal of Occupational and Environmental Medicine | Random sample from National Population Register of Finland<br><br>M + W<br><br>Mean age = 44.5y (SEM = 0.15) | 3,264            | Job strain;<br><br>Effort-reward imbalance | Cross-sectional | Maslach Burnout Inventory- General Survey                                                 | 1-item survey<br><br>Binary respondent classification;<br><br>“Active” classified as > 4 hours of LTPA/week.                                                               | Work-related burnout syndrome related to low PA.<br><br>When sex, age, marital status, and occupational grade were taken into account, 1 SD increase in burnout score was related to a 1.21-fold increase (95% CI, 1.12–1.30) in the likelihood of low PA.<br>Work-related exhaustion was associated with low physical activity (OR, 1.23; 95% CI, 1.14–1.32).          |
| Aldana, 1996<br><br>Perceptual and Motor Skills                       | Working adults at Connecticut General Life Insurance Company<br><br>M+ W<br><br>Mean age = 37.3y             | 32,229           | None                                       | Cross-sectional | Strain Questionnaire<br><br>Life Events Schedule                                          | Items from NHIS survey; FREQ and DUR for 22 different activities; converted into kcal<br><br>Binary respondent classification: “high active” classified as > 3 kcal/kg/day | Higher PA related to lower stress.<br><br>Low active subjects – 31.7% had moderate stress. 24.4% had high stress<br>High active subjects- 9.2% had moderate stress (OR = .75, 95% CI = .70-.80) 4.7% had high stress (OR = .49. 95% CI = .46-.53)                                                                                                                       |
| Ali, 2006<br><br>Scandinavian Journal of Public Health                | Working adults<br><br>M + W<br><br>Age range = 18-64y                                                        | 5,180            | Job strain                                 | Cross-sectional | Karasek job control/latitude<br><br>Economic stress (1 item question)<br><br>Unemployment | 1 item survey (4-point scale)<br><br>Binary respondent classification: low PA vs. all other categories.                                                                    | M and W classified as having job strain (OR = 1.50, 95% CI = 1.07, 2.10; OR = 1.60, 95% CI = 1.06, 2.44), unemployed (OR = 1.64, 95% CI = 1.13, 2.37; OR = 1.81, 95% CI = 1.16, 2.44) or under economic stress were more likely to be inactive (OR = 1.87, 95% CI = 1.37, 2.54; OR = 1.76, 95% CI = 1.26, 2.46) were more likely to be inactive than relaxed employees. |

|                                                    |                                                                                                                                                                  |            |                      |                 |                                                                                                                        |                                                                                                                                                        |                                                                                                                                                                                                                                                                                                                                                                                                         |
|----------------------------------------------------|------------------------------------------------------------------------------------------------------------------------------------------------------------------|------------|----------------------|-----------------|------------------------------------------------------------------------------------------------------------------------|--------------------------------------------------------------------------------------------------------------------------------------------------------|---------------------------------------------------------------------------------------------------------------------------------------------------------------------------------------------------------------------------------------------------------------------------------------------------------------------------------------------------------------------------------------------------------|
| Allen, 2006<br>American Behavioral Scientist       | Working adults (at least 20 hours of work/week) and either married or living with partner with at least one child at home<br><br>M + W<br><br>Age range = 19-78y | 246        | Work-family conflict | Cross-sectional | FIW<br><br>WIF                                                                                                         | 1-item survey (yes/no)<br><br>Binary respondent classification: Yes = participation in any PA outside work in past month (example activities provided) | Path analysis (BMI model) – FIW associated with no PA ( $B = -.20, p = .036$ ), but not WIF.<br><br>PA correlated with FIW, $r = -.16 (p < .05)$ , but not WIF ( $r = -.10$ ).                                                                                                                                                                                                                          |
| Allison, 1999<br>Canadian Journal of Public Health | Canadians enrolled in the 1994 National Population Health Survey<br><br>M + W<br><br>Age range = 20-24y                                                          | 1,395      | Life events          | Cross-sectional | Chronic Stress<br><br>Psychological distress                                                                           | Physical inactivity measured with Physical Activity Index<br><br>Binary respondent classification: “inactive” if energy expenditure < 1.5 kcal/kg/day  | The most consistent predictors of risky behaviors were chronic stress and “main” occupational activity; however, chronic stress and distress did <i>not</i> predict physical inactivity status.                                                                                                                                                                                                         |
| de Assis et al., 2008<br>Clinics                   | Able-bodied Brazilian patients with PTSD<br><br>M + W<br><br>Mean age = 40.1y<br><br>Age range = 15-68y                                                          | 50         | None                 | Retrospective   | Clinician Administered Post Traumatic Stress Disorder Scale<br><br>SCID<br><br>Beck Depression and Anxiety Inventories | Binary respondent classification: “Active” defined as exercising > 3 days/week, > 20 min/session at an “adequate intensity”.                           | Significant changes in PA were observed after the onset of PTSD (52% before onset of PTSD, 22% afterwards).<br><br>Stated lack of time and motivation for justification for stopping PA.                                                                                                                                                                                                                |
| Bennett, 2006<br>Annals of Behavioral Medicine     | Working adults from 26 small manufacturing firms in USA<br><br>M + W<br><br>Mean age = 43.2y (SD = 11.7)                                                         | 1,442      | Job strain           | Cross-sectional | Karasek Job Content Q. (modified)                                                                                      | LTPA survey<br><br>FREQ of 8 activities causing labored breathing in last 4 weeks<br><br>Continuous hours/week<br><br>$r = .53$ w/ accelerometry       | LTPA related to job strain ( $p = .01$ ) and job control ( $p = .01$ ) but not job demands ( $p = .25$ ).<br><br>Job strain by ethnicity interaction ( $p = .03$ ).<br><br>Whites experiencing job strain reported 1 fewer hours a week of leisure PA compared to whites not reporting job strain.<br><br>Contrary to predictions, minorities increased leisure PA with job strain, compared to whites. |
| Berger, 2008<br>Sport Management Review            | Canadian adolescents<br><br>M + W<br><br>Age range = 15-19y                                                                                                      | Not stated | None                 | Qualitative     | N/A                                                                                                                    | N/A                                                                                                                                                    | Respondents report:<br>1) Physical and mental stress of home difficulties makes planning for sport participation difficult.<br>2) Sport is alternatively used as a coping mechanism for difficulties at home.                                                                                                                                                                                           |

|                                                         |                                                                                                     |       |                                                        |                                                            |                                                                                              |                                                                                                                                                                                                                                                                                                                                              |                                                                                                                                                                                                                                                                           |
|---------------------------------------------------------|-----------------------------------------------------------------------------------------------------|-------|--------------------------------------------------------|------------------------------------------------------------|----------------------------------------------------------------------------------------------|----------------------------------------------------------------------------------------------------------------------------------------------------------------------------------------------------------------------------------------------------------------------------------------------------------------------------------------------|---------------------------------------------------------------------------------------------------------------------------------------------------------------------------------------------------------------------------------------------------------------------------|
| Bopp, 2004<br>Women & Health                            | Older, rural African American and white adults<br><br>Women only<br><br>Mean age = 70.6y (SD = 9.2) | 102   | None                                                   | Cross-sectional                                            | 1 item of perceived stress taken from NHIS survey:<br><br>FREQ of stress in last two weeks.  | PA Scale for the Elderly<br><br>2 data transformations<br><br>Hours/week of strength training<br><br>Binary respondent classification: Any strength training participation                                                                                                                                                                   | No relationship between stress and strength training participation.<br><br>Stress and strength training ( $r = -.12, p = .24$ )<br><br>Stress and strength training hours/week ( $r = 0.11, p = .27$ )                                                                    |
| Boutelle, 2000<br>Preventive Medicine                   | Working adults at 24 worksites<br><br>M + W<br><br>Age range unclear                                | 9,043 | None                                                   | Cross-sectional                                            | PSS-4                                                                                        | Godin Leisure Time Q<br><br>4-category respondent classification- quartiles of LTPA                                                                                                                                                                                                                                                          | Classification into higher exercise quartiles is associated with less perceived stress in both M and W.<br><br>OR of low exercise for men who are high stress = 0.67 (95% CI = .56-.81)<br><br>OR of low exercise for women who are high stress = 0.74 (95% CI = .63-.88) |
| Brannagan, 2011<br>Health Education Journal             | College freshmen<br><br>M + W<br><br>Mean age = 18.5y (SD = 1.08)<br><br>Age range = 18-24y         | 369   | Social-Cognitive Theory;<br><br>Health Promotion Model | Cross-sectional; data collected 3 months post-disaster     | Impact of Event Scale (subjective distress scale specifically related to hurricane distress) | Stanford 7 Day PA Recall<br><br>Data transformed into energy expenditure (kcal/day)                                                                                                                                                                                                                                                          | Positive relationship between stress and PA in path analysis ( $\beta = .162, p = .05$ ). Higher stress related to greater PA.<br><br>Self-efficacy did not mediate the relationship between stress and PA.                                                               |
| Bray & Born, 2004<br>Journal of American College Health | College freshmen<br><br>M + W<br><br>Mean age = 17.8y (SD = .54)<br><br>Age range = 18-19y          | 145   | Life transitions                                       | Cross-sectional<br><br>Retrospective self-report of change | POMS-Adolescent<br><br>GHQ-28; Emotional distress                                            | Items from YRBS and National College Health Risk Behavior Survey;<br><br>FREQ and DUR of vigorous PA<br><br>2 time points: PA in last 8 weeks of HS and 1 <sup>st</sup> 8 weeks of college<br><br>4-category respondent classification: If FREQ > 3sessions/week for > 20 min classified as "active" (both recalled baseline and in college) | Transitioning students, overall, declined in PA from 3.32 (SD = 2.12) sessions/week to 2.68 (SD = 2.24) sessions/week ( $p < .01, ES = 0.30$ ).<br><br>Insufficiently active students were lower on vigor ( $p < .01$ ), higher on tension and fatigue ( $p$ 's < .05).   |

|                                                    |                                                                             |       |                                          |                 |                                                |                                                                                                                                                          |                                                                                                                                                                                                                                                  |
|----------------------------------------------------|-----------------------------------------------------------------------------|-------|------------------------------------------|-----------------|------------------------------------------------|----------------------------------------------------------------------------------------------------------------------------------------------------------|--------------------------------------------------------------------------------------------------------------------------------------------------------------------------------------------------------------------------------------------------|
| Bray, 2006                                         | College freshmen                                                            | 175   | Transitions                              | Cross-sectional | Distress: GHQ-28                               | Items from BRFSS (2003); FREQ and DUR of vigorous exercise > 10 min over last 7 mos                                                                      | Insufficiently active students reported more somatic symptoms ( $p = .02$ ), but no difference in anxiety/insomnia ( $p = .10$ ).<br><br>Insufficiently active students scored lower on psychological wellbeing.                                 |
| Journal of American College Health                 | M + W<br>Mean age = 17.8y (SD = .54)<br>Age range = 17-19y                  |       |                                          |                 |                                                | Binary respondent classification: Those exercising > 3 sessions/week for > 20 minutes classified as "sufficiently active"                                | No difference in upper respiratory infectious illnesses between sufficiently and insufficiently active students.                                                                                                                                 |
| Brisson, 2000                                      | White collar workers in 21 organizations                                    | 6,995 | Job strain                               | Cross-sectional | Karasek Job Content Questionnaire (18-items)   | 1 item survey                                                                                                                                            | Prevalence of sedentary behavior was elevated in men in the lowest quartile of decision latitude (OR = 1.3; 95% CI = 1.0 - 1.7), in the passive group (OR, 1.3; 95% CI, 1.0 -1.5), and in the high strain group (OR = 1.2; 95% CI = 1.0 - 1.6).  |
| Journal of Occupational and Environmental Medicine | M + W<br>Mean age (M) = 41.4y (SD = .14)<br>Mean age (W) = 38.5y (SD = .13) |       |                                          |                 |                                                | Binary respondent classification: Sedentary defined as FREQ < 1x/weekly during the previous 6 months<br><br>Exercise defined as "rigorous" LTPA > 20 min | In women, this prevalence was elevated in the third quartile of psychological demand (OR = 1.3, 95% CI = 1.1 to 1.6).<br><br>Associations remained even after adjustment for age, education, PA at work, social support, hostility and cynicism. |
| Buchman, 1991                                      | First-year medical school students                                          | 200   | None                                     | Cross-sectional | 1 item survey for daily stress (5-point scale) | FREQ of vigorous LTPA or exercise > 20 minutes without stopping.                                                                                         | Daily stress was weakly associated with fitness, FREQ of PA, peer-PA comparison rating in men ( $r = -.16, -.23, -.29$ , respectively) but not in women.                                                                                         |
| Journal of Psychosomatic Medicine                  | M + W<br>Mean age = 23.4y                                                   |       |                                          |                 | CES-D                                          | DUR of exercise routine in months.<br><br>1-item rating of exercise level compared to peers (5-point scale)                                              | Daily stress predicted FREQ of PA ( $B = -.62, SE = .236, p = .009$ ) and peer-PA comparison rating ( $B = -.27, SE = .087, p = .002$ ).<br><br>Stress correlated with BMI in women ( $r = .35$ ).                                               |
| Burdette, 2008                                     | Adults in Texas                                                             | 1,504 | Neighborhood Disorder and Distress Model | Cross-sectional | Kessler K-6 Distress Scale                     | 3- items for FREQ of walking, MVPA.                                                                                                                      | Distress and irregular exercise correlated, $r = .11$ ( $p < .001$ ).                                                                                                                                                                            |
| Social Science Medicine                            | M + W<br>Mean age = 45.8y (SD = 16.6)                                       |       |                                          |                 | Perceived Neighborhood Disorder (3 items)      | Binary respondent classification                                                                                                                         | Distress did not predict exercise after controlling for other variables ( $p = .085$ ).<br><br>Irregular exercise was a partial mediator of the association between psychological distress and obesity ( $z = 2.46, p < 0.05$ ).                 |

|                                                                  |                                                                                                                      |         |                       |                              |                                                                                                                       |                                                                                                                        |                                                                                                                                                                                                                                                                                                                                                                                                                                                                                                      |
|------------------------------------------------------------------|----------------------------------------------------------------------------------------------------------------------|---------|-----------------------|------------------------------|-----------------------------------------------------------------------------------------------------------------------|------------------------------------------------------------------------------------------------------------------------|------------------------------------------------------------------------------------------------------------------------------------------------------------------------------------------------------------------------------------------------------------------------------------------------------------------------------------------------------------------------------------------------------------------------------------------------------------------------------------------------------|
| Chang, 2008<br>Journal of the American Dietetic Association      | Low income overweight and obese mothers<br>W only<br>Mean age = 27.2y (SD = 4.7)<br>Age range = 18-35y               | 80      | Barriers for activity | Qualitative                  | Open-ended questions about health and lifestyle                                                                       | None                                                                                                                   | Decreases in PA may be exacerbated by stressful situations.<br>Stress is a significant barrier for physical activity.<br>Time availability; demands from family<br>Mothers consistently commented about lack of adequate personal time. They said that if they had time, they would take a walk to relieve their stress. However, feelings of exhaustion and lack of time made routine exercise nearly impossible.                                                                                   |
| Chang, 2008<br>BMC Public Health                                 | Low income mothers (55% African American)<br>W only<br>Mean age = 27.1y (SD = 6.0)                                   | 216     | None                  | Qualitative; Factor analysis | Personal factors affecting stress management (9 items)<br>Environmental factors affecting stress management (2 items) | Personal factors affecting physical activity (11 items)<br>Environmental factors affecting physical activity (5 items) | In "Additional file 2" (supplementary file), women report that they do not exercise when they feel stressed, depressed, angry, upset.<br>Also exercise "helps me to relieve my stress"                                                                                                                                                                                                                                                                                                               |
| Choi, 2010<br>Journal of Occupational and Environmental Medicine | Workers from National Survey of Midlife Development<br>M + W<br>Age range = 32-69y<br>36.5% of sample between 50-59y | 2,019   | Job strain            | Cross-sectional              | Karasek Job Content Q.: Job demands, Job control                                                                      | 2 items for LTPA (moderate LTPA, vigorous LTPA)<br>FREQ of MVPA. MVPA defined for participants.                        | After controlling for covariates (e.g., age, race, education, income, physical effort at work, obesity, and alcohol consumption), high job control was associated with active LTPA.<br>Active jobs (high control and low demands) and low-strain jobs (high control and high demands), compared to passive jobs (low control and low demands), increased the odds for active LTPA.<br>The associations varied by sex and education level.<br>Job demands alone were not associated with active LTPA. |
| Cohen, 1991<br>Preventive Medicine                               | Working adults at PA power plants<br>M + W<br>Mean age (M) = 36y (SD = 9)<br>Mean age (W) = 30y (SD = 5)             | > 1,100 | None                  | Cross-sectional              | Job demands, life events, and marital conflict                                                                        | Lack of PA = not exercising at least once or twice in last month                                                       | No main effect of stress on exercise.<br>Women who work full time exercise less.<br>Men who have high job demands and marital conflict exercise more.<br>Employment status                                                                                                                                                                                                                                                                                                                           |
| Cohen, 1998<br>Health Psychology                                 | Healthy adults<br>M + W<br>Age range = 18-55y                                                                        | 276     | Stress-health model   | Cross-sectional              | Life Events and Difficulties Schedule                                                                                 | Exercise frequency per week (dichotomous)                                                                              | "Marginal association" of stress and exercise. 62.9% of those with a chronic stressor exercise <2x/week compared to 49.0% of those without a chronic stressor. (OR = 1.57, 95% CI = 0.86-2.86)                                                                                                                                                                                                                                                                                                       |

|                                                                                                           |                                                           |                |                                             |                                                             |                                                                                                        |                                                                                                                                        |                                                                                                                                                                                                                                                                                 |
|-----------------------------------------------------------------------------------------------------------|-----------------------------------------------------------|----------------|---------------------------------------------|-------------------------------------------------------------|--------------------------------------------------------------------------------------------------------|----------------------------------------------------------------------------------------------------------------------------------------|---------------------------------------------------------------------------------------------------------------------------------------------------------------------------------------------------------------------------------------------------------------------------------|
| Connell, 1994<br>American Journal of Alzheimer's Care                                                     | Caregivers<br>M + W<br>Age range = 43-88y                 | 44             | Spouse care giving                          | Cross-sectional                                             | Q that addressed health behavior, status, coping strategies, relationship between caregiver and spouse | 1-item indicator of changes in exercise since starting care giving; 1-item indicator of using exercise to cope with care giving stress | 33% report lower levels of exercise.<br>9.7% reported an increase in exercise.<br>20.5% report using exercise to cope with care giving stress.                                                                                                                                  |
| Conroy, 2007<br>Medicine and Science in Sports and Exercise                                               | Early post-menopausal women<br>W only<br>Mean age = 56.9y | 497            | None                                        | Cross-sectional                                             | PSS-4                                                                                                  | Modifiable Activity Q (MAQ)                                                                                                            | PSS did not predict PA (spearman rho = -.04)<br>PSS did not predict PA lapse.<br>Women with high activity levels reported higher self-efficacy and greater perceived benefits from PA than women with lower activity levels.                                                    |
| Devine, 2000<br>Social Science and Medicine                                                               | Pregnant women<br>W only<br>Age range = 18- 40y           | 36             | Life transitions<br>Life course perspective | Qualitative<br>Prospective<br>Multiple interviews over time | Interview guide covered smoking and alcohol use, social roles, and emotional well-being                | Interview guide covered perceptions and practices for lifestyle behaviors (i.e. diet, PA, etc) and physical well-being                 | Pregnancy disrupts attempts to be physically active.<br>Stress and age or role related changes in perspective interrupted the continuity of weight orientations and PA behavior patterns.<br>Some respondents reported exercising for their mental health.                      |
| Devonport, 2012<br>Journal of Sports Behavior                                                             | Habitual exercisers in the United Kingdom<br>M + W        | 9              | Stress and coping                           | Qualitative                                                 | Semi-structured interview                                                                              | Semi-structured interview (exercise regime)                                                                                            | All participants modified their exercise regime when they experienced water loss. However, these modifications varied by individual, from minimal to considerable changes, which also effected psychological and physiological wellbeing.                                       |
| Divin, 2009, 2010<br>a) Dissertation at Oklahoma State;<br>b) Medicine and Science in Sports and Exercise | Student athletes;<br>Female student athletes<br>M + W     | a) 98<br>b) 52 | None                                        | Cross-sectional                                             | PSS-10                                                                                                 | HPLP PA                                                                                                                                | 2009: PA and stress were associated in NCAA Division I athletes ( $r = -.35$ ) but no association in NAIA athletes.<br>2010: PA and stress associated ( $r = -.30$ )<br>No relationship for male athletes (Personal communication with author).<br>Athletic Division $p = .006$ |



|                                                 |                                                                                                                                                            |       |                                            |                     |                                                                |                                                                                                                                                                                                                                                                                                                                                                                                                                                                                                                                                                                                                                                                                                                                                                                                                                                 |                                                                                                                                                                                                                                                                                                                                                                                                                 |
|-------------------------------------------------|------------------------------------------------------------------------------------------------------------------------------------------------------------|-------|--------------------------------------------|---------------------|----------------------------------------------------------------|-------------------------------------------------------------------------------------------------------------------------------------------------------------------------------------------------------------------------------------------------------------------------------------------------------------------------------------------------------------------------------------------------------------------------------------------------------------------------------------------------------------------------------------------------------------------------------------------------------------------------------------------------------------------------------------------------------------------------------------------------------------------------------------------------------------------------------------------------|-----------------------------------------------------------------------------------------------------------------------------------------------------------------------------------------------------------------------------------------------------------------------------------------------------------------------------------------------------------------------------------------------------------------|
| Emeny, 2012<br>Brain, Behavior,<br>and Immunity | Workers in southern<br>Germany<br><br>M + W<br><br>Mean age = 46.4y<br>(SD = .4; low strain);<br>46.8y (SD = .3; high<br>strain)<br><br>Age range = 35-74y | 951   | Job strain                                 | Cross-<br>sectional | Karasek Job strain<br>index                                    | Physical inactivity<br>versus physical activity<br>was defined by 2<br>separate 4-category<br>interview questions that<br>assessed hours/week<br>spent on sports activities<br>during leisure time in<br>summer and winter.<br>Each participant was<br>asked: How often do<br>you carry out sports in<br>the winter?<br>How often do you carry<br>out sports in the<br>summer?<br>Answers were given on<br>a four-level graded scale<br>(no activity, <1<br>hour/week, 1 to 2<br>hour/week, and >2<br>hour/week). One<br>variable was created,<br>whereby a participant<br>was considered inactive<br>if he or she participated<br>in less than 1 hour/week<br>of regular physical<br>activity in at least 1<br>season.<br><br>Two items: hours/week<br>of activity in summer<br>and winter (Likert<br>items): binary for active<br>or inactive | Workers with high job strain were more likely to be physically inactive<br>than workers with low job strain (61.6% vs. 48.6%, $p < .0001$ ).<br><br>Physical inactivity mediated the association between job strain and C-<br>Reactive Protein (inflammation) ( $\beta = .17$ , $SE = .06$ , $p = .007$ ).<br><br>In mediation model, job stain predicts physical inactivity ( $\beta = 1.06$ , $p =$<br>.003). |
| Fan, 2011<br>Health & Place                     | Chicago urban<br>dwellers<br><br>M + W                                                                                                                     | 1,544 | Author-<br>proposed<br>conceptual<br>model | Cross-<br>sectional | Two items:<br>Victim of violence and<br>Threatened or harassed | Three items:<br>Trying to lose weight,<br>Health limited moderate<br>PA, and importance of<br>getting exercise                                                                                                                                                                                                                                                                                                                                                                                                                                                                                                                                                                                                                                                                                                                                  | No relationship of stress to PA.                                                                                                                                                                                                                                                                                                                                                                                |

|                                                                                                                                     |                                                                        |       |                                    |                                     |                                                                                                                                          |                                                                                                                                                                                     |                                                                                                                                                                                                                                                                                                                                                                                                                                                           |
|-------------------------------------------------------------------------------------------------------------------------------------|------------------------------------------------------------------------|-------|------------------------------------|-------------------------------------|------------------------------------------------------------------------------------------------------------------------------------------|-------------------------------------------------------------------------------------------------------------------------------------------------------------------------------------|-----------------------------------------------------------------------------------------------------------------------------------------------------------------------------------------------------------------------------------------------------------------------------------------------------------------------------------------------------------------------------------------------------------------------------------------------------------|
| Fondell, 2011<br>Medicine and Science in Sports and Exercise                                                                        | Population-based web cohort of adults<br>M + W<br>Age range = 20-60y   | 1,509 | None                               | Cross-sectional                     | PSS-14                                                                                                                                   | Time for nine activity levels (including sleep), converted to MET/hour/day<br><br>3-category respondent classification:<br>"Medium" active<br>"High" active" = PA > 55 MET/hour/day | At baseline:<br>More low stress (PSS < 23) individuals classified as "high" active vs. high stress (PSS > 23) individuals, 57.4 vs. 42.6%.<br><br>The same trend seen for "medium" PA classification: 56.1 vs. 43.9%.<br><br>Among those who have had an upper respiratory tract infection:<br>Low stress: 268 individuals classified as achieving MVPA.<br>High stress: 174 individuals classified as achieving MVPA.<br>Appropriate stats not provided. |
| Fredman, 2006<br>Preventive Medicine                                                                                                | 179 caregivers,<br>670 non care-givers<br>Women only<br>Age range >80y | 849   | Caregiving                         | Cross-sectional<br><br>Case control | PSS-14<br><br>CES-D                                                                                                                      | Daily PA (includes blocks of walking and flights of stairs)<br><br>Leisure PA: walk for exercise, any other exercise                                                                | Spouse caregivers were higher than non-caregivers for perceived stress and depression.<br><br>Spouse caregivers had higher daily physical activity than other groups (p = 0.03) but lower leisure time PA (OR = 0.64, 95% CI = 0.41-1.00).                                                                                                                                                                                                                |
| Fry, 1985<br>Journal of Social Psychology                                                                                           | Vietnamese youth refugees<br>M + W<br>Age range = 25-30y               | 150   | Stressed population                | Qualitative                         | Interview for stress ideations- hopelessness (3 items), low self-esteem (2 items), social isolation (3 items), general anxiety (4 items) | None                                                                                                                                                                                | Subjects reported decreased physical activity when they felt general anxiety.<br><br>Low self-esteem and self-criticism made the subjects feel inadequate, which made it difficult for them to attain their goals.                                                                                                                                                                                                                                        |
| Fuller-Jonap, 1995<br>Journal Aging and Health                                                                                      | 52 caregivers<br>53 controls<br>Men only<br>Age range = 65-91y         | 105   | Spouse care giving                 | Case control                        | Brief Symptom Inventory                                                                                                                  | 1 item from Cornell Medical Index (dichotomous)                                                                                                                                     | Regular exercise habit was lower in caregivers ( $\chi^2 = 3.96, p < .05$ ).<br><br>Male spouse caregivers had poorer mental and physical outcomes in certain health domains than male non-caregivers.                                                                                                                                                                                                                                                    |
| Gadalla, 2012<br>Chronic Disease and Injuries in Canada                                                                             | Canadian adolescents<br>M + W<br>Age range = 12-17y                    | 5,476 | Unhealthy behaviors in adolescents | Cross-sectional                     | Canadian Community Health Survey (1 stress item; Age range = 15-17y)                                                                     | Level of PA (active) determined by total energy expenditure, which was calculated by FREQ, time, and MET per session.<br>Sedentary activity (inactive)                              | 1/3 of adolescents engaged in unhealthy behaviors (i.e. drinking, smoking, etc) and it was significantly associated with income, education, and sex.<br><br>While the percentage of adolescents consuming a healthy diet increased over the study, at least 50% were still leading unhealthy lifestyles.                                                                                                                                                  |
| Gallant, 1997<br>Journal of Aging and Health<br><br>Gallant, 1998<br>Research on Aging<br><br>Gallant, 2003<br>Psychology and Aging | Caregivers<br>M + W<br>Age range = 30-92y                              | 233   | Spouse care giving                 | Cross-sectional (mail survey)       | Social and Emotional Burden subscales of the Caregiver Burden Inventory                                                                  | 1 item adapted from the Alameda County Study: PA frequency<br><br>Composite index of five health behaviors                                                                          | Since starting care giving:<br>49.3% of all subjects are less active<br>9.2% of subjects are more active<br>No gender differences<br><br>Path analysis model including neuroticism found no support of perceived stress impacting physical activity.<br><br>Objective burden of care giving and depressive symptoms predict health behaviors.                                                                                                             |

|                                                         |                                                                                                |       |                            |                 |                                      |                                                                                                       |                                                                                                                                                                                                                                                                                         |
|---------------------------------------------------------|------------------------------------------------------------------------------------------------|-------|----------------------------|-----------------|--------------------------------------|-------------------------------------------------------------------------------------------------------|-----------------------------------------------------------------------------------------------------------------------------------------------------------------------------------------------------------------------------------------------------------------------------------------|
| Giuli, 2012<br>Archives of Gerontology and Geriatrics   | Italians<br>M + W<br>Age range = 65-85<y<br><br>Mean Age = 76.9y<br>(SD = 8.5y)                | 306   | Elderly PA                 | Cross-sectional | PSS-14                               | 1 item on frequency of exercise per week. Subjects classified as active (> 1 hour week) or non-active | PA levels decreased in subjects with probable cognitive decline, depression and high-perceived stress levels (p < 0.001).                                                                                                                                                               |
| Goston, 2012<br>American Journal of Industrial Medicine | Brazilian civil servants<br>M + W<br>Age range <35-54< y<br><br>Mean age= 40.2y<br>(SD = 11.1) | 893   | None                       | Cross-sectional | Job Stress Scale – Brazilian version | 1 item – any activity in the last year (yes or no)                                                    | The stress scale shows that 29.6% of public servants were in the low strain group, 21.4% were in the high strain group, and 19% were in the active group.                                                                                                                               |
| Gottlieb, 1984<br>Health Education Quarterly            | Random sample<br>M + W<br>Age range = 20-64y                                                   | 3,025 | Life events and life style | Cross-sectional | Telephone Interview- Life Events     | Exercise freq for specific activities; including dancing, gardening, sports                           | Men have higher PA with stress, yet the findings were not significant. However, education and social network directly effected life-style health practices.<br><br>No association for women, yet social network and life events were negatively related to life-style health practices. |

|                                                               |                                                                                                    |       |                        |                     |                                                                                                                                  |                                                                                                 |                                                                                                                                                                                                                                                                                                                                                                                                                                                                                                                                                                                                                                                                                                                                                                                                                                                                                                                                                                                                                                                                                                                                                                                                                                                                                                                                                                                                                                                                                                                                                                                                                                                                                                                                                                                                                                                                                                                                                                                                                                                                                                                                                                                                                                                                                                                                                                                       |
|---------------------------------------------------------------|----------------------------------------------------------------------------------------------------|-------|------------------------|---------------------|----------------------------------------------------------------------------------------------------------------------------------|-------------------------------------------------------------------------------------------------|---------------------------------------------------------------------------------------------------------------------------------------------------------------------------------------------------------------------------------------------------------------------------------------------------------------------------------------------------------------------------------------------------------------------------------------------------------------------------------------------------------------------------------------------------------------------------------------------------------------------------------------------------------------------------------------------------------------------------------------------------------------------------------------------------------------------------------------------------------------------------------------------------------------------------------------------------------------------------------------------------------------------------------------------------------------------------------------------------------------------------------------------------------------------------------------------------------------------------------------------------------------------------------------------------------------------------------------------------------------------------------------------------------------------------------------------------------------------------------------------------------------------------------------------------------------------------------------------------------------------------------------------------------------------------------------------------------------------------------------------------------------------------------------------------------------------------------------------------------------------------------------------------------------------------------------------------------------------------------------------------------------------------------------------------------------------------------------------------------------------------------------------------------------------------------------------------------------------------------------------------------------------------------------------------------------------------------------------------------------------------------------|
| Griffith, 2011<br>Health Education<br>and Behavior<br>Journal | African American<br>urban dwellers in the<br>American Midwest<br><br>Men only                      | 105   | Role Strain            | Qualitative         | Exploratory focus<br>groups to examine<br>perspectives on social,<br>cultural, and<br>economical barriers to<br>health behaviors | Exploratory focus<br>groups to examine<br>barriers to health<br>behaviors associated<br>with PA | This article focuses on five themes representing male roles and associated stressors and strains that inhibited greater participation in physical activity: men's time was filled by commitments associated with male roles and responsibilities; men prioritized the roles of father, spouse, community member, and particularly provider/employee over other aspects of their lives, including their individual health; social and cultural norms, many developed during childhood, about the importance of work; social and cultural norms around physical activity; and employment-related strain, exhaustion, and stress coping strategies.<br><br>Men like this one felt as though they were just "getting by" and keeping their lives from falling apart. In this context of working long and stressful hours, not only is physical activity a low priority, but alternative activities may provide outlets for coping with stress.<br><br>The stress and exhaustion these men experienced resulting from fulfilling provider and other key family and social roles seemed to be major obstacles inhibiting them from participating in physical activity more regularly. Not only did they report the stress and strain of prioritizing work, but these African American men noted how physically and mentally draining it was to seek to be good providers, fulfill family roles, and contribute to their communities. They also had other strategies for coping with stress that further reduced their motivation to consistently engage in physical activity.<br><br>Finally, the stress and exhaustion of seeking to fulfill employment, family, and community roles decreased African American men's likelihood of being active, and their strategies for coping with stress, stressors, and strains typically did not include physical activity.<br><br>Although engaging in physical activity has been associated consistently with better psychological health, the men in our focus groups rarely reported physical activity as a strategy for stress management. Our participants described stress management activities that promoted relaxation or "non-brain activity" after work or during other leisure time. Leisure time also was considered time to spend with family, not for pursuing individual interests or needs such as engaging in physical activity. |
| Grzywacz, 2001<br>Journal of Health<br>and Social<br>Behavior | Workers in the<br>National Survey of<br>Midlife Development<br><br>M + W<br><br>Age range = 25-74y | 3,032 | Social<br>inequalities | Cross-<br>sectional | Decision latitude<br><br>Work-family spillover                                                                                   | Two items (summer and<br>winter exercise<br>frequency). Items<br>averaged for analysis.         | Younger, non-black men with a higher education and larger household income tend to exercise more regularly.<br>Higher education contributes to a slower decline in PA throughout life.                                                                                                                                                                                                                                                                                                                                                                                                                                                                                                                                                                                                                                                                                                                                                                                                                                                                                                                                                                                                                                                                                                                                                                                                                                                                                                                                                                                                                                                                                                                                                                                                                                                                                                                                                                                                                                                                                                                                                                                                                                                                                                                                                                                                |

|                                                                                 |                                                                                                                                                                |                                                    |                        |                 |                                                                                           |                                                                                                                                                                                                                                          |                                                                                                                                                                                                                                                                                                                                                                                                                              |
|---------------------------------------------------------------------------------|----------------------------------------------------------------------------------------------------------------------------------------------------------------|----------------------------------------------------|------------------------|-----------------|-------------------------------------------------------------------------------------------|------------------------------------------------------------------------------------------------------------------------------------------------------------------------------------------------------------------------------------------|------------------------------------------------------------------------------------------------------------------------------------------------------------------------------------------------------------------------------------------------------------------------------------------------------------------------------------------------------------------------------------------------------------------------------|
| Hansen, 2010<br>International Archives of Occupational and Environmental Health | Danish white collar workers<br>M + W<br>Age range = 25-67y                                                                                                     | 389                                                | Job demand and control | Cross-sectional | Copenhagen Psychosocial Q (job control and job demand)<br><br>Stress-Energy Questionnaire | International Physical Activity Questionnaire                                                                                                                                                                                            | No relationship (see page 147, paragraph two of results).<br><br>No difference between PA groups for stress.<br><br>However, physically active men perceived lower stress.                                                                                                                                                                                                                                                   |
| Harper, 2007<br>Psycho-Oncology                                                 | Individuals with diagnosis and treatment of cancer 6 months – 10 years before study<br><br>M + W<br><br>Age range = 20-84y<br><br>Mean age = 49.9y (SD = 12.1) | 216                                                | None                   | Cross-sectional | Cancer distress – IES intrusions and avoidance                                            | Five questions: 1. Whether they currently engage in behavior on a regular basis (yes/no), 2. More than or less than 6 months, 3. Changed or not changed since diagnosis, 4. Exercise sessions per month, 5. Average minutes per session. | Exercise behavior increased in 26% of sample after cancer diagnosis.<br><br>IES-Intrusions, but not IES-avoidance related to greater change in physical function behaviors ( $\beta = .03$ , SE = .01, OR = 1.03, $p < .05$ ).<br><br>Appraisal of cancer diagnosis as a major trauma not predictive of physical function behaviors.<br><br>No specific analysis conducted for exercise with IES or cancer stress appraisal. |
| Hellerstedt, 1997<br>International Journal of Epidemiology                      | MN worksite Employees<br><br>M + W                                                                                                                             | 3,843                                              | Job strain             | Cross-sectional | Karasek Job strain (demands)                                                              | Exercise sessions/week<br>12 g's about specific activities                                                                                                                                                                               | No relationship.<br><br>More job latitude predicts exercise, however.<br><br>Women who are more stressed may actually exercise more, though this was not significant.                                                                                                                                                                                                                                                        |
| Heslop, 2001<br>British Journal of Health Psychology                            | Scottish employees from a variety of occupations<br><br>M + W<br><br>Age >16 y                                                                                 | 6,000 +                                            | Stress-health model    | Cross-sectional | Reeder Stress Inventory (4-item)                                                          | Hours of work and recreational exercise                                                                                                                                                                                                  | Lower levels of recreational exercise were associated with higher levels of stress for men only.<br><br>Higher socio-economic groups had higher perceived stress, which was associated with little recreational exercise and other behaviors, such as smoking and drinking alcohol.                                                                                                                                          |
| Hoffman, 2012<br>Gerontologist                                                  | Caregivers and non-caregivers<br><br>M + W<br><br>Age range = 45-63y<br>"Baby Boomers"                                                                         | 5,688 informal caregivers<br><br>12,941 caregivers | Caregiving             | Cross-sectional | Kessler K6 Distress Scale                                                                 | Two items, combined to form Sedentary behavior score (dichotomous)<br><br>Multidimensional Health Behavior Measure                                                                                                                       | Caregivers and non-caregivers differed in levels of distress ( $p = .003$ )<br><br>No correlation of distress and sedentary behavior.<br><br>Caregivers and non-caregivers did not differ in levels of sedentary.                                                                                                                                                                                                            |

|                                                       |                                                                                |        |                         |                                                                                                          |                                                                                 |                                                                                                                                                                                                  |                                                                                                                                                                                                                                                                                                                                   |
|-------------------------------------------------------|--------------------------------------------------------------------------------|--------|-------------------------|----------------------------------------------------------------------------------------------------------|---------------------------------------------------------------------------------|--------------------------------------------------------------------------------------------------------------------------------------------------------------------------------------------------|-----------------------------------------------------------------------------------------------------------------------------------------------------------------------------------------------------------------------------------------------------------------------------------------------------------------------------------|
| Ishizaki, 2008                                        | Japanese working adults                                                        | 3,571  | Job strain              | Cross-sectional (Prospective stress data over 7 years but PA data reported only at the first time point) | Job strain questionnaire (not specified)                                        | 1 item for exercise<br>FREQ<br><br>4-category respondent classification: "almost no exercise", "light exercise", "brisk and sweating exercise 1-2x/week", brisk and sweating exercise > 3x/week" | High strain associated with no regular exercise in both men and women.<br><br>No data shown.<br><br>No statistical tests printed.                                                                                                                                                                                                 |
| Scandinavian Journal of Work, Environment, and Health | M + W<br><br>Age range = 30-53y                                                |        |                         |                                                                                                          |                                                                                 |                                                                                                                                                                                                  |                                                                                                                                                                                                                                                                                                                                   |
| Iwasaki, 2001                                         | Canadian population sample                                                     | 17,626 | Stress-health model     | Cross-sectional                                                                                          | Adjusted Specific Chronic Stress Index;<br><br>Adjusted Recent Life Event Index | Physically active leisure, measured by three indicators (PA index, daily PA participation, PA frequency)                                                                                         | SEM models show that chronic stress predicts PA (B = .04, p < .05) and life event stress predicts PA (B = .08, p < .05).                                                                                                                                                                                                          |
| Canadian Journal of Public Health                     | M + W                                                                          |        |                         |                                                                                                          |                                                                                 |                                                                                                                                                                                                  |                                                                                                                                                                                                                                                                                                                                   |
| Johansson, 1991                                       | Swedish workers                                                                | 7,201  | Work organization       | Cross-sectional                                                                                          | Job demands, non validated (6 items); job resources                             | Exercise<br>Sedentary behavior, 1 item Likert scale                                                                                                                                              | Demands and resources related to sedentary behavior, but not exercise.<br><br>Autonomy related to exercise.                                                                                                                                                                                                                       |
| Social Science Medicine                               | M + W<br><br>Age range = 16-65y                                                |        |                         |                                                                                                          |                                                                                 |                                                                                                                                                                                                  |                                                                                                                                                                                                                                                                                                                                   |
| Jones, 1992                                           | College students; national probability sample                                  | 1,411  | Health-risk behavior    | Cross-sectional                                                                                          | 2 items of perceived stress: how much; sought help for stress                   | Minutes of aerobic activity: a) group activity or b) solo activities                                                                                                                             | Stress did not predict solo or group aerobic activity.<br><br>Negative affect was inversely related to health behaviors in both men and women, yet amount of hours worked only had a negative impact on women.                                                                                                                    |
| Journal of America College Health                     | M + W<br><br>Age range = 18-25y                                                |        |                         |                                                                                                          |                                                                                 |                                                                                                                                                                                                  |                                                                                                                                                                                                                                                                                                                                   |
| Jonsson, 1999                                         | Age-stratified random sample                                                   | 1,618  | Job control and demands | Cross-sectional                                                                                          | Job content Q                                                                   | Physical/laboratory investigations                                                                                                                                                               | Women with high stress tended to have low job control and low social support at work.<br>For both genders, high stress was reported when job demands were high<br>Men with high social support and job control would exercise more during leisure time.<br>Job control was positively related to education, social class, and PA. |
| Journal of Cardiovascular Risk                        | M + W<br><br>Age range = 25-64y                                                |        |                         |                                                                                                          |                                                                                 |                                                                                                                                                                                                  |                                                                                                                                                                                                                                                                                                                                   |
| Kelsey, 2006                                          | Blue collar workers from 12 worksites in five rural counties in North Carolina | 1,093  | None                    | Cross-sectional                                                                                          | Perceived Stress Scale (PSS-4)<br><br>[Coping items assessed as well]           | 11 item checklist assessing frequency and duration of different activities                                                                                                                       | No relationship between stress and PA.                                                                                                                                                                                                                                                                                            |
| American Journal of Health Behavior                   | W only<br><br>Age >18y                                                         |        |                         |                                                                                                          |                                                                                 |                                                                                                                                                                                                  |                                                                                                                                                                                                                                                                                                                                   |
| Kornitzer, 1986                                       | Belgian white collar workers                                                   | 3,179  | Job strain              | Cross-sectional                                                                                          | Job stress Q (13 items)                                                         | Minnesota Leisure time PA Q (total energy expenditure); also occupational PA                                                                                                                     | No correlation between stress and exercise, but there was between stress and fitness.<br><br>Fitness and stress inversely related.                                                                                                                                                                                                |
| Postgraduate Medical Journal                          | M only<br><br>Age range = 40-55y                                               |        |                         |                                                                                                          |                                                                                 |                                                                                                                                                                                                  | Note: Professional status and study level related to higher PA.                                                                                                                                                                                                                                                                   |

|                                                                 |                                                                                             |        |                                                  |                     |                                                                      |                                                                                                                                                                                                              |                                                                                                                                                                                                                                                                                                                                                                                                                                                                                                                                                                                                                       |
|-----------------------------------------------------------------|---------------------------------------------------------------------------------------------|--------|--------------------------------------------------|---------------------|----------------------------------------------------------------------|--------------------------------------------------------------------------------------------------------------------------------------------------------------------------------------------------------------|-----------------------------------------------------------------------------------------------------------------------------------------------------------------------------------------------------------------------------------------------------------------------------------------------------------------------------------------------------------------------------------------------------------------------------------------------------------------------------------------------------------------------------------------------------------------------------------------------------------------------|
| Kouvonen, 2005<br>Preventive<br>Medicine                        | Municipal and<br>hospital workers<br><br>M + W<br><br>Age range = 17-64y                    | 46,573 | Job strain                                       | Cross-<br>sectional | Karasek's Job Content<br>Q.                                          | Leisure PA intensity<br>and duration<br>Average weekly<br>participation<br>Met hours/week                                                                                                                    | Individuals with high job strain, passive jobs, and low control had less PA (MET hours/week) than those with low strain and high control (p < .001).<br><br>Job type - Strain and passive jobs associate with low PA only among non-manual employee (p < .001).                                                                                                                                                                                                                                                                                                                                                       |
| Kouvonen, 2006<br>Occupational and<br>Environmental<br>Medicine | Public sector workers<br><br>M + W<br><br>Age range = 17-64y                                | 38,151 | Effort/reward<br>imbalance                       | Cross-<br>sectional | Effort/reward ratio (1<br>effort item, average of<br>3 reward items) | No validated survey.<br>Report average time per<br>week in leisure and<br>commuting activity.<br>Stratified by intensity<br>and weighted by METS.<br>Binary: < 2.0 MET<br>hours/day defined as<br>sedentary. | Women with high imbalance more sedentary (OR = 1.10, 95% CI = 1.03 to 1.18, adjusted for age; OR = 1.08, 95% CI = 1.01 to 1.16, adjusted for age, other demographic, occupational and behavioral factors).<br><br>Men with high imbalance more sedentary (OR = 1.22, 95% CI = 1.07 to 1.39, adjusted for age; OR = 1.17, 95% CI = 1.02 to 1.33, adjusted for age, other demographic, occupational and behavioral factors).<br><br>Adjusting for job strain (job control and demands) at the group level did not impact OR's, however, adjustment for individual level job strain resulted in disappearance of effect. |
| Krause, 1993<br>Social Science and<br>Medicine Journal          | Japanese elderly<br><br>M + W<br><br>Age > 60y                                              | 2,220  | Elderly PA                                       | Cross-<br>sectional | Health stress;<br>Financial stress                                   | Three questions about<br>exercise frequency                                                                                                                                                                  | Health "stress" (p < .001) but not financial stress related to lesser physical activity.<br><br>Social support tends to promote frequent exercise and more physical exercise leads to less psychological distress.                                                                                                                                                                                                                                                                                                                                                                                                    |
| Kuper, 2002<br>Occupational and<br>Environmental<br>Medicine    | Civil servants from<br>Whitehall II Study<br><br>M + W<br><br>Age range = 33-55y            | 10,308 | Effort/reward<br>imbalance                       | Cross-<br>sectional | Effort-reward<br>imbalance scale                                     | 1 item, exercising > 1.5<br>hours per week<br>(moderate or vigorous)                                                                                                                                         | In relation to rewards, there was a high incidence of CHD, as well as poor physical and mental functioning at phase 5.<br><br>People who exercise have worse balance of effort/reward.                                                                                                                                                                                                                                                                                                                                                                                                                                |
| Kye, 2012<br>Asian Pacific<br>Journal of Cancer<br>Prevention   | Random population<br>sample of Korean<br>adults<br><br>M + W<br><br>Age range = 30-69y      | 1,500  | Psychosocial factors<br>and health<br>behaviors  | Cross-<br>sectional | Psychosocial Well-<br>Being Index: Short<br>form                     | Dichotomous – exercise<br>5 days a week for 30<br>minutes (yes or no)                                                                                                                                        | Exercise not predicted by stress.<br><br>Self-efficacy was a strong predictor of health behaviors.                                                                                                                                                                                                                                                                                                                                                                                                                                                                                                                    |
| Lallukka, 2004<br>Preventive<br>Medicine                        | Workers in Finland<br><br>M + W<br><br>Age range = 40-60y                                   | 6,243  | Working<br>conditions<br>and health<br>behaviors | Cross-<br>sectional | Karasek Job Content Q                                                | PA past 12 months, 4<br>different intensity<br>levels, conversion to<br>METS, binary based on<br>public health dosage                                                                                        | Women with low demands and high control (low strain) had more PA than high strain women, adjusting for age, education, occupational class, and marital status (OR = 1.29, 95% CI = 1.07-1.56).                                                                                                                                                                                                                                                                                                                                                                                                                        |
| Lallukka, 2008<br>Social Science and<br>Medicine Journal        | Workers in 3 United<br>Kingdom, Finland,<br>and Japan<br><br>M + W<br><br>Age range= 45-60y | 11,680 | Job strain                                       | Cross-<br>sectional | Karasek Job Strain                                                   | London: Physical<br>Inactivity < 1 hour of<br>active/week<br>Finland and Japan:<br>lowest quintile of<br>activity                                                                                            | Job strain was associated with less PA among men in the United Kingdom and women in Finland.<br><br>Men in London who reported passive work were more likely to be physically inactive, along with women in Helsinki.                                                                                                                                                                                                                                                                                                                                                                                                 |

|                                             |                                                                 |       |                                                           |                                                  |                                                                                           |                                                                                                                                                                            |                                                                                                                                                                                                                                                                                                                                                                                               |
|---------------------------------------------|-----------------------------------------------------------------|-------|-----------------------------------------------------------|--------------------------------------------------|-------------------------------------------------------------------------------------------|----------------------------------------------------------------------------------------------------------------------------------------------------------------------------|-----------------------------------------------------------------------------------------------------------------------------------------------------------------------------------------------------------------------------------------------------------------------------------------------------------------------------------------------------------------------------------------------|
| Landsbergis, 1998                           | Employees                                                       | 285   | Job strain                                                | Cross-sectional                                  | Kasarek job demands, latitude                                                             | Dichotomous variable composed from frequency and duration of exercise.                                                                                                     | Relationship between job demands and sedentary behavior ( $p < .05$ ).<br><br>Change in job characteristics was not associated with changes in being overweight.                                                                                                                                                                                                                              |
| American Journal of Health Promotion        | M Only<br>Age range = 30-60y                                    |       |                                                           |                                                  |                                                                                           |                                                                                                                                                                            |                                                                                                                                                                                                                                                                                                                                                                                               |
| Lang, 2003                                  | Women who had visited a Veterans' Affairs clinic in California. | 221   | None                                                      | Cross-sectional                                  | PTSD Checklist-Civilian Version<br><br>PTSD Scale for DSM-IV                              | Exercise health behavior items<br><br>Binary respondent classification for weekly moderate exercise and weekly vigorous exercise                                           | No association of PTSD / stressful life experience and exercise behavior, but a trend was seen for an inverse relationship.<br><br>Weekly moderate exercise: 60.0% for sexually assaulted group vs. 69.7% for non-assaulted group (not significant).<br><br>Weekly vigorous exercise: 13.7% for sexually assaulted group vs. 24.0% for non-sexually assaulted group (not significant).        |
| Behavioral Medicine                         | Mean age = 46.6y (SD = 14.6)<br>Age range = 20-86y              |       |                                                           |                                                  |                                                                                           |                                                                                                                                                                            |                                                                                                                                                                                                                                                                                                                                                                                               |
| LaRouche, 2012                              | Adults                                                          | 86    | Life transitions                                          | Cross-sectional – Follow up data from experiment | Life transitions (adolescence, beginning of college, entry into labor market, parenthood) | Interview data. Participants coded as inactive, insufficiently active, moderately or vigorously active<br>FREQ and DUR of PA were examined during transitional life stages | Individuals taking more than 5 hours of PA/week decreased from 70.4% to 17.0% between adolescence and midlife.<br><br>Declined when entering the labor market from 55.9% to 23.4%.<br><br>No significant differences between the two groups at midlife.                                                                                                                                       |
| Journal of Physical Activity and Health     | M + W<br>Mean age = 44.0y (SD = 1.2)                            |       |                                                           |                                                  |                                                                                           |                                                                                                                                                                            |                                                                                                                                                                                                                                                                                                                                                                                               |
| Laugero, 2011                               | Puerto-Rican adults                                             | 1,300 | Relationship between stress and dietary/activity patterns | Cross-sectional                                  | PSS; Life Events Inventory                                                                | Modified Harvard Alumni Activity Survey                                                                                                                                    | Highest quartile of stress worst for exercise.<br>P = .008, even when controlling for cortisol and insulin (which were examined as mediators).<br><br>Cortisol<br>TV watching                                                                                                                                                                                                                 |
| Appetite                                    | M + W<br>Age range = 45-75y                                     |       |                                                           |                                                  |                                                                                           |                                                                                                                                                                            |                                                                                                                                                                                                                                                                                                                                                                                               |
| Li, 2012                                    | Low income mothers                                              | 131   | Family functioning                                        | Cross-sectional                                  | PSS; Patient Health Questionnaire-9 (for depression)                                      | Two question from International Physical Activity Questionnaire;<br><br>Time watching television using standardized questions                                              | PSS correlated with LTPA ( $r = .25, p < .05$ ).<br>PSS correlated with TV viewing ( $r = .29, p < .001$ ).<br>PSS predicts TV watching ( $p < .001$ ).<br>When depression entered into model, stress no longer predictive of TV viewing.<br>PSS predicts low LTPA (OR = 1.79; $p < .05$ ) independent of depression.<br>Depression does not predict LTPA when stress entered into the model. |
| Women & Health                              | W only<br>Age range <30- 40< y                                  |       |                                                           |                                                  |                                                                                           |                                                                                                                                                                            |                                                                                                                                                                                                                                                                                                                                                                                               |
| Lim, 2005                                   | Random survey of community-dwelling older adults in Australia   | 8,881 | PA among elderly                                          | Cross-sectional                                  | Kessler 6 Distress                                                                        | Single item; at least 30 minutes of walking or moderate or vigorous activity on at least five days of last week                                                            | Adequate PA was independently associated with males of a younger age who had better physical functioning, lower psychological distress, and an adequate consumption of fruits and vegetables.<br><br>Health problems were often reported as barriers to PA.                                                                                                                                   |
| Preventive Medicine                         | M + W<br>Age range >65y                                         |       |                                                           |                                                  |                                                                                           |                                                                                                                                                                            |                                                                                                                                                                                                                                                                                                                                                                                               |
| Ludlow, 2008                                | M + W                                                           | 69    | None                                                      | Cross-sectional                                  | PSS                                                                                       | Yale PA Q                                                                                                                                                                  | P = 0.12 (not significant, but you see a trend).                                                                                                                                                                                                                                                                                                                                              |
| Medicine and Science in Sports and Exercise | Age range = 50-70y                                              |       |                                                           |                                                  |                                                                                           |                                                                                                                                                                            |                                                                                                                                                                                                                                                                                                                                                                                               |



|                                                                                 |                                                                                                                                                       |                                              |                                                                 |                                            |                                    |                                                                                                            |                                                                                                                                                                                                                                                                                                         |
|---------------------------------------------------------------------------------|-------------------------------------------------------------------------------------------------------------------------------------------------------|----------------------------------------------|-----------------------------------------------------------------|--------------------------------------------|------------------------------------|------------------------------------------------------------------------------------------------------------|---------------------------------------------------------------------------------------------------------------------------------------------------------------------------------------------------------------------------------------------------------------------------------------------------------|
| Ma, 2008<br>Research in<br>Nursing & Health                                     | Taiwanese adults<br>M + W<br>Age range = 20-60y                                                                                                       | 239                                          | Physical<br>Activity for<br>Persons<br>with<br>Anxiety<br>model | Cross-<br>sectional                        | Stressful Life Events<br>Checklist | Past Year Regular PA<br>Checklist                                                                          | Beta = -.16 in SEM model<br>Stress had a stronger influence on PA than anxiety.<br><br>Perceived life stress events, perceived benefits of activity, and perceived self-efficacy for activity directly influenced PA.                                                                                   |
| Magoc, 2010<br>Health Education<br>Journal                                      | Predominantly<br>Hispanic college<br>students<br>M + W<br>Mean age = 22.05y<br>(SD = 4.72)                                                            | 392                                          | Attitudes<br>related to<br>exercise<br>importance               | Cross-<br>sectional                        | Not reported                       | Four items: FREQ,<br>DUR, intensity,<br>importance                                                         | Participation in exercise was high, but 69% did not meet the CDC<br>recommendations for PA.<br><br>Exercise importance and gender were strong predictors of PA.                                                                                                                                         |
| Makinen, 2010<br>Scandinavian<br>Journal of Work,<br>Environment, and<br>Health | Finnish workers<br>M + W<br>Age > 30y                                                                                                                 | 3,355                                        | Health<br>behavior<br>related to<br>socioeconomic<br>position   | Cross-<br>sectional,<br>national<br>survey | Karasek Job Strain                 | Inactive (e.g., reading<br>during leisure)<br>Active (e.g., walking >4<br>hour/week or PA >3<br>hour/week) | Blue-collar workers had more job strain. They were more likely to be<br>inactive during leisure compared to office workers (OR = 1.44-1.62, 95%<br>CI = 1.08, 2.09).<br><br>White or blue collar work                                                                                                   |
| Marquez, 2012<br>Geriatric Nursing                                              | Caregivers and non-<br>caregivers<br>M + W<br>Mean age<br>(caregivers)= 68.6y<br>(SD = 9.1)<br><br>Mean age (non<br>caregivers) = 67.7y<br>(SD = 9.2) | 24<br>caregivers<br><br>48 non<br>caregivers | Caregiving                                                      | Case<br>control;<br>Cross-<br>sectional    | PSS-10                             | Objective: Actigraph<br>GT1M & 7164<br><br>Subjective: PA scale for<br>the elderly                         | Caregivers and non-caregivers only differed on one measure of PA,<br>minutes of light intensity PA in the morning (caregivers, M = 2.0 (SD =<br>2.7); non-caregivers, M = 5.3 (SD = 9.2), p = .03, ES = .36.<br><br>Non-caregivers reported stronger social support to exercise from family<br>members. |

|                                                    |                                                                                                                                                                |       |                     |                                                                        |                                                                                             |                                                                                                                                                                                                                                                                                                                                                                                                                                                                                                                                                            |                                                                                                                                                                                                                                                                                                                                                                                                                                                                              |
|----------------------------------------------------|----------------------------------------------------------------------------------------------------------------------------------------------------------------|-------|---------------------|------------------------------------------------------------------------|---------------------------------------------------------------------------------------------|------------------------------------------------------------------------------------------------------------------------------------------------------------------------------------------------------------------------------------------------------------------------------------------------------------------------------------------------------------------------------------------------------------------------------------------------------------------------------------------------------------------------------------------------------------|------------------------------------------------------------------------------------------------------------------------------------------------------------------------------------------------------------------------------------------------------------------------------------------------------------------------------------------------------------------------------------------------------------------------------------------------------------------------------|
| McBride, 2000<br>Psycho-Oncology                   | Patients with early stage prostate cancer and breast cancer<br><br>M + W<br><br>Age range (prostate cancer) = 43-90y<br><br>Age range (breast cancer) = 28-91y | 920   | Stressed population | Cross-sectional                                                        | Stress Event (cancer diagnosis)<br><br>Impact of Events Scale                               | Routine exercise was assessed as exercise that gets your heart thumping or causes you to sweat for periods > 20 minutes<br><br>Participants were asked whether they 'set aside time for exercise on a weekly basis', and if so, FREQ/week, average DUR/session and the length of time that exercise has been part of their routine.<br><br>Binary respondent classification: Exercise weekly (yes/no)<br><br>2 items assessed stage of readiness to begin exercising<br><br>Binary respondent classification: Pre-contemplation stage vs. all other stages | Prostate patients who reported exercising regularly had lower impact scores than those who were not exercising (medians: 0.13 vs 0.56, respectively; $p < 0.02$ ).<br><br>Exercise stage of change was not related to stress.                                                                                                                                                                                                                                                |
| Melamed, 1997<br>Journal of Psychosomatic Research | Israeli workers without CVD<br><br>M Only<br><br>Age range = 20-64y                                                                                            | 1,859 | Life events         | Cross-sectional                                                        | Israeli Psychiatric Epidemiology Research Interview life event scale;<br>Karasek job strain | Exercise: yes or no (binary)                                                                                                                                                                                                                                                                                                                                                                                                                                                                                                                               | There was a trend between intensity level of events in life and low exercise.<br><br>Life events were positively associated with somatic complaints.                                                                                                                                                                                                                                                                                                                         |
| Miller, 2002<br>Health Psychology                  | Parents of a child with and without a cancer diagnosis<br><br>M + W<br><br>Age range (cancer) = 24-74y<br><br>Age range (healthy) = 28-47y                     | 50    | Stressed population | Cross-sectional<br><br>Case control; Cancer diagnosis vs. no diagnosis | PSS-10<br><br>POMS<br><br>CES-D                                                             | Paffenberger Activity Scale<br><br>Data analyzed as minutes/week of brisk activity and energy expenditure (kcal/week)                                                                                                                                                                                                                                                                                                                                                                                                                                      | No association but an inverse trend observed.<br><br>Brisk activity (minutes/week): Parents of children with cancer have less PA (Mean = 46.0, SD = 72.9) than parents with a healthy child (Mean = 80.2, SD = 103.5; not significant; ES = .33).<br><br>Energy expenditure (Kcal/week): Parents of children with cancer have less energy expenditure (Mean = 875.1, SD = 659.8) than parents with a healthy child (Mean = 1193.9, SD = 1058.2; not significant; ES = 30.1). |

|                                                     |                                                                  |          |                                                    |                            |                                                                 |                                                                                            |                                                                                                                                                                                                                                                                                                                                                                                                        |
|-----------------------------------------------------|------------------------------------------------------------------|----------|----------------------------------------------------|----------------------------|-----------------------------------------------------------------|--------------------------------------------------------------------------------------------|--------------------------------------------------------------------------------------------------------------------------------------------------------------------------------------------------------------------------------------------------------------------------------------------------------------------------------------------------------------------------------------------------------|
| Moore-Greene, 2012                                  | African American paraprofessionals                               | 90       | Chronic stress                                     | Cross-sectional            | Salient Stressor Impact Q                                       | Physical exercise subscale of the Brief COPE Inventory                                     | Biggest stressors for women include finances (33%), work (28%), and family/friends (19%). Decreased physical exercise created the relationship between chronic stress and BML, which was high for these women, as 90% of them were obese.                                                                                                                                                              |
| Ethnicity & Disease                                 | W only<br>Age range = 18-50y                                     |          |                                                    |                            |                                                                 |                                                                                            |                                                                                                                                                                                                                                                                                                                                                                                                        |
| Morassaei, 2011 JOEM                                | Canadian workers from Canadian National Population Health Survey | 4,167    | Working conditions and demands                     | Cross-sectional            | Job Content Q (13-item)                                         | Frequency and duration of 21 activities                                                    | Sense of mastery.<br>Higher levels of skill discretion and decision latitude were associated with higher LTPA.                                                                                                                                                                                                                                                                                         |
| Journal of Occupational and Environmental Medicines | M + W<br>Age range = 25-60y                                      |          |                                                    |                            |                                                                 |                                                                                            |                                                                                                                                                                                                                                                                                                                                                                                                        |
| Mulder, 2011 BMC Public Health                      | Population of Utrecht, Netherlands                               | 3,050    | Socioeconomic position related to health behaviors | Cross-sectional            | Kessler K-6 Distress Scale<br>Financial Stress<br>Health Stress | Participants reported the typical amount (min) of exercise per week                        | For example, by multiplying the B value of financial stress for exercise with the range of the financial stress scale (i.e. 2), it was found that the difference between a minimum and maximum score on the financial stress scale was associated with a reduction of approximately 35 minutes exercise per week.                                                                                      |
| American Journal of Health Prom                     | M + W<br>Mean age = 44.9y (SD = 15.9)                            |          |                                                    |                            |                                                                 |                                                                                            |                                                                                                                                                                                                                                                                                                                                                                                                        |
| Nelson, 2008                                        | College students                                                 | 4,167    | Health risk behaviors                              | Cross-sectional            | Job Content Q                                                   | FREQ and DUR of 21 common activities over last 3 months. Transformed to energy expenditure | Credit card debt was associated with being overweight/obese, insufficient PA, excess TV watching, fast food consumption, unhealthy weight control, and body dissatisfaction.                                                                                                                                                                                                                           |
| Public Health Nursing                               | M + W                                                            |          |                                                    |                            |                                                                 |                                                                                            |                                                                                                                                                                                                                                                                                                                                                                                                        |
| Nies, 1999                                          | African American women from Tennessee                            | 16       | Life style<br>Barriers to activity                 | Qualitative (focus groups) | Focus group discussion                                          | Unstructured interview (3 open-ended questions)                                            | Stress reduction acts as a facilitator of PA, along with daily routine, practical and convenient activities, weight loss, enjoyment, family and peer support, etc.                                                                                                                                                                                                                                     |
| Public Health Nursing                               | W only<br>Age range= 35-50y                                      |          |                                                    |                            |                                                                 |                                                                                            |                                                                                                                                                                                                                                                                                                                                                                                                        |
| Ng, 2003 Health Psychology                          | Workers from 26 worksites                                        | 12,000 + | Perceived stress and health behaviors              | Cross-sectional            | PSS-4                                                           | Godin – 7 day recall                                                                       | Moderately vigorous PA debilitated by stress ( $p = .01$ ).                                                                                                                                                                                                                                                                                                                                            |
| Health Psychology                                   | M + W<br>Mean age = 40y                                          |          |                                                    |                            |                                                                 |                                                                                            |                                                                                                                                                                                                                                                                                                                                                                                                        |
| Padden, 2011 Military Medicine                      | Military spouses                                                 | 105      | Stressed population (Demands, burdens)             | Cross-sectional            | PSS-10<br>Personal demands (work hour, children at home)        | Multidimensional Health Behavior Inventory exercise subscale                               | Exercise and stress were correlated ( $r = -.31$ ).<br>Exercise and stress management also related ( $r = .37$ ).<br>PSS predicted exercise behavior ( $\beta = -.278, p < .001$ ).<br>22% of the variance in exercise was explained by perceived stress and hours worked.<br>Personal demands (hours worked, but not children at home) also predicted exercise behavior ( $\beta = -.282, p < .05$ ). |
| Military Medicine                                   | W only<br>Mean age = 30.54y (SD = 6.3)                           |          |                                                    |                            |                                                                 |                                                                                            |                                                                                                                                                                                                                                                                                                                                                                                                        |

|                                                                                  |                                                                                                                                     |                      |                                             |                 |                                                                      |                                                         |                                                                                                                                                                                                                                                                                      |
|----------------------------------------------------------------------------------|-------------------------------------------------------------------------------------------------------------------------------------|----------------------|---------------------------------------------|-----------------|----------------------------------------------------------------------|---------------------------------------------------------|--------------------------------------------------------------------------------------------------------------------------------------------------------------------------------------------------------------------------------------------------------------------------------------|
| Palomo, 2008<br>Neurotoxicity<br>Research                                        | Middle and high school students, university students, white and blue collar employees, government and health worksites<br><br>M + W | Unclean but over 413 | None                                        | Cross-sectional | Subjective Stress Experience scale<br><br>Coping Resources Inventory | Unclear                                                 | Stress does not predict PA.<br><br>Several other characteristics do predict PA, such as positive affect, energy, and health-seeking behavior.                                                                                                                                        |
| Paluch, 2012<br><br>Medicine and Science in Sports                               | Young adults<br><br>M + W<br>Age range = 20-34y                                                                                     | 52                   | None                                        | Cross-sectional | PSS (high stress defined as > 12)                                    | SenseWear Mini armband (worn average of 7.8 days)       | MVPA & PSS, $r = -.28$ ( $p = .046$ ).<br><br>Odds of being high stress: a) 16% lower with every 10 minute increment higher of exercise (OR = .84, CI = .72-0.99, $p = .04$ ); b) 40% lower with every 30 minutes higher increment of exercise (OR = .60, CI = .37-.98, $p = .04$ ). |
| Park, 2008<br><br>Journal Health of Psychology                                   | Middle-aged cancer survivors<br><br>M + W<br>Age range < 50y<br><br>Mean age = 45.2y                                                | 250                  | Health behavior changes in cancer survivors | Cross-sectional | Brief COPE, modified for cancer                                      | Change of exercise behavior (1 item)                    | Positive health behavior changes were related to social support, sense of control, life meaning, and coping.<br><br>A lack of meaning of life and avoidance coping led to negative health behaviors.                                                                                 |
| Peker, 2011<br><br>Journal of Dental Education                                   | Turkish freshman dental students<br><br>M + W<br>Age range = 18-22y<br><br>Mean age = 19.43y (SD = .89)                             | 111                  | Health promoting behaviors                  | Cross-sectional | PSS-10 (Turkish version)                                             | HPLP II                                                 | No correlation between PA and PSS-10.<br><br>Females reported having engaged in less PA than males, yet more responsible health behaviors.                                                                                                                                           |
| Puustinen, 2011<br><br>European Archives of Psychiatry and Clinical Neuroscience | Population convenience sample from Finland<br><br>M + W<br>Age range = 35-56y                                                       | 883                  | Psychological distress                      | Cross-sectional | Distress: GHQ-12                                                     | 1 item: frequency of doing PA causing sweating          | High levels of distress associated with low leisure time PA.<br><br>Subjects with low psychological distress were younger and more physically active than subjects with medium or high psychological distress.                                                                       |
| Rao, 2012<br><br>International Journal of Preventive Medicine                    | Random sampling of medical students<br><br>M + W<br>Age range = 17-25y                                                              | 240                  | Barriers to PA                              | Cross-sectional | Open-ended                                                           | Semi-structured questionnaire; use of sports facilities | 69% of the medical students had a normal BMI and more than half utilized the sports facility.<br>Lack of time, laziness, and exhaustion from academics were the biggest hindering factors to exercise.                                                                               |

|                                      |                                                                                                                          |                                               |                                        |                 |                                                                           |                                                                            |                                                                                                                                                                                                                              |
|--------------------------------------|--------------------------------------------------------------------------------------------------------------------------|-----------------------------------------------|----------------------------------------|-----------------|---------------------------------------------------------------------------|----------------------------------------------------------------------------|------------------------------------------------------------------------------------------------------------------------------------------------------------------------------------------------------------------------------|
| Reardon & Aydin, 1993                | Breast cancer survivors                                                                                                  | 96                                            | Stressed population, coping model      | Cross-sectional | Stressfulness of cancer-related problems                                  | 1 item survey- self reported change in exercise                            | Exercise and stressfulness of cancer-related problems correlated $r = -.27$ ( $p < .05$ ).                                                                                                                                   |
| Health Communication                 | 60% no longer in treatment<br><br>W only<br>Mean age = 58y (clinic group), 57y (support group)<br><br>Age range = 35-80y | 35 in clinic group<br><br>57 in suppose group |                                        | Retrospective   | 1 item survey- self reported change in stress<br><br>Ways of Coping Scale |                                                                            | Behavioral change in stress inversely related to change in exercise $r = -.24$ ( $p < .05$ ).<br><br>Stressfulness of cancer-related problem predicts exercise behavior change ( $\beta = -.25$ , $t = -2.05$ , $p = .04$ ). |
| Reed, 1989                           | Japanese descent in Hawaii cohort (1965)                                                                                 | 8,006                                         | Job strain                             | Cross-sectional | Job strain; job latitude                                                  | Physical activity index (no more information given)                        | No relationship between stress and exercise.                                                                                                                                                                                 |
| American Journal of Epidemiology     | M only<br><br>Born 1900-1919                                                                                             |                                               |                                        |                 |                                                                           |                                                                            |                                                                                                                                                                                                                              |
| Rhodes, 2009                         | Random sample of adult Canadians                                                                                         | 358                                           | Belief based promotion of leisure time | Cross-sectional | Behavioral beliefs of exercise (stress relief included)                   | Godin Leisure Time Q<br><br>Exercise intention                             | People exercising 6 or 7 days a week had the highest endorsement of stress relief as a reason to exercise (72% and 71% endorsement respectively).                                                                            |
| Health, Education, and Behavior      | M + W<br><br>Mean age (study 1) = 50.6y (SD = 14.14)<br><br>Mean age (study 2) = 53.9y (SD = 16.03)                      |                                               |                                        |                 |                                                                           |                                                                            |                                                                                                                                                                                                                              |
| Rodgers, 1998                        | Community-based activity program                                                                                         | 178                                           | Incentives for PA and self-efficacy    | Cross-sectional | Incentives for stress reduction                                           | Exercising < 2 or > 3 times/week                                           | Incentives for stress reduction and mental health discriminated low active vs high active women.<br><br>Highly active women also reported higher incentives for mental health and stress reduction.                          |
| Journal of Applied Social Psychology | W only<br><br>Mean age = 38.33y (SD = 8.74)                                                                              |                                               |                                        |                 |                                                                           |                                                                            |                                                                                                                                                                                                                              |
| Roohafza, 2007                       | Iranian adults                                                                                                           | 5,892                                         | None                                   | Cross-sectional | 12-item general health Q (distress)                                       | 4 Types of PA (leisure, work, commuting, home). Duration converted to METS | No relationship between stress and PA.                                                                                                                                                                                       |
| Stress and Health                    | M + W<br><br>Age range > 19y<br><br>Mean age = 40.5y (SD = 15.4)                                                         |                                               |                                        |                 |                                                                           |                                                                            |                                                                                                                                                                                                                              |

|                                                          |                                               |                      |                                                            |                     |                                                                                                       |                                                                                                       |                                                                                                                                                                                                                 |
|----------------------------------------------------------|-----------------------------------------------|----------------------|------------------------------------------------------------|---------------------|-------------------------------------------------------------------------------------------------------|-------------------------------------------------------------------------------------------------------|-----------------------------------------------------------------------------------------------------------------------------------------------------------------------------------------------------------------|
| Roos, 2007                                               | Finnish adults                                | 4,346                | Work/<br>family<br>conflicts                               | Cross-<br>sectional | Mental workload of job                                                                                | 12-month recall of PA intensity and duration (study created)                                          | Higher mental workload not related to lower PA in men ( $p < 0.1$ ).                                                                                                                                            |
| Public Health Nutrition                                  | M + W                                         |                      |                                                            |                     | Work-family conflict                                                                                  |                                                                                                       | More work-family conflict related to lesser PA (women, $p < .05$ ; men $p < .1$ ).                                                                                                                              |
|                                                          | Age range = 45-60y                            |                      |                                                            |                     |                                                                                                       |                                                                                                       | Family-work conflict not related to less PA in women ( $p < .1$ ).                                                                                                                                              |
| Rose, 1998                                               | Blue and white-collar workers                 | 972                  | Life events                                                | Cross-<br>sectional | Life events (yes/no; 18 items)                                                                        | Health examination (i.e. cholesterol, BMI, blood pressure, concentration of serum lipids, etc.)       | There is a significant correlation between PA and social support for both blue and white-collar workers ( $r = .22$ , $p < .0001$ ).                                                                            |
| Occupational Medicine                                    | M only                                        | Blue collar = 375    |                                                            |                     | Mood, mental strain (9-grade scale; 2 items), and expression of feelings (0-24 visual analogue scale) |                                                                                                       |                                                                                                                                                                                                                 |
|                                                          | Mean age (blue collar) = 47.2y (SD = 1.51)    | White collar = 597   |                                                            |                     | Social support (yes/no; 8 items)                                                                      |                                                                                                       |                                                                                                                                                                                                                 |
|                                                          | Mean age (white collar) = 47.4y (SD = 1.46)   |                      |                                                            |                     |                                                                                                       |                                                                                                       |                                                                                                                                                                                                                 |
| Rosengren, 1991                                          | Middle aged men who lived in Goteborg, Sweden | 6,935                | Psychological stress and the incidence of coronary disease | Cross-<br>sectional | 1-item Likert scale on stress frequency                                                               | Single item: "PA during leisure was measured 1 to 4, with 1 denoting sedentary leisure time activity" | 37% of subjects who report low physical activity also report high stress.                                                                                                                                       |
| American Journal of Cardiology                           | M only                                        |                      |                                                            |                     |                                                                                                       |                                                                                                       | Also collected life event stress data but did not report association with PA.                                                                                                                                   |
|                                                          | Age range = 47-55y                            |                      |                                                            |                     |                                                                                                       |                                                                                                       |                                                                                                                                                                                                                 |
| Sarafino, 1999                                           | UG students                                   | 104                  | Stressful events                                           | Cross-<br>sectional | Hassles Assessment Scale for Students in College                                                      | Hours per week of exercise                                                                            | Modest but significant negative correlations between exercising and hassle frequency, $r(102) = -.19$ , $p = .050$ , unpleasantness, $r(102) = -.30$ , $p = .002$ , and severity $r(102) = -.21$ , $p = .029$ . |
| Journal of American College Health                       | M + W                                         |                      |                                                            |                     |                                                                                                       |                                                                                                       | Only unpleasantness of hassles predicted exercise in each analysis.                                                                                                                                             |
|                                                          | Age range = 18-24y                            |                      |                                                            |                     |                                                                                                       |                                                                                                       | $F(1, 80) = 6.41$ , $p = .013$ , and the beta value for unpleasantness was $-.27$ .                                                                                                                             |
| Scelza, 2005                                             | Individuals with a spinal cord injury         | 72                   | Stressed population                                        | Cross-<br>sectional | PSS-14                                                                                                | Binary respondent classification: exercisers vs. non-exercisers                                       | No differences observed in perceived stress level of exercisers vs. non-exercisers.                                                                                                                             |
| American Journal of Physical Medicine and Rehabilitation | M + W                                         |                      |                                                            |                     |                                                                                                       | Concern Index                                                                                         | Stress and concern index were correlated ( $r = .26$ , $p = .036$ ).                                                                                                                                            |
|                                                          | Mean age = 44.1y (SD = 13.0)                  |                      |                                                            |                     |                                                                                                       |                                                                                                       |                                                                                                                                                                                                                 |
| Schulz, 1997                                             | Population-based sample of caregivers         | Care recipients: 333 | Caregiving stress                                          | Cross-<br>sectional | 1-item survey on emotional and/or physical strain of caregiving                                       | 1-item survey                                                                                         | Only half of caregivers report strain from spousal care.                                                                                                                                                        |
| Annals of Behavioral Medicine                            | M + W                                         | Caregivers: 395      |                                                            |                     |                                                                                                       | Binary respondent classification: Report of "not having enough time to exercise" (agree or not agree) | Strained caregivers reported more depression and anxiety symptoms and less exercise than controls and non-strained caregivers.                                                                                  |
|                                                          | Age range (care recipients) > 65y             | Non-caregivers: 424  |                                                            |                     |                                                                                                       |                                                                                                       | Caregivers reporting strain more likely to endorse "not having enough time to exercise" than non-care giving controls (32% vs. 8%).                                                                             |

|                                                            |                                                                                                                  |        |                                                                            |                     |                                                                                                                       |                                                                                                                                                                                                                                                                                                                                                                                                                                |                                                                                                                                                                                                                                                                                                                                                                                                                                                                                                                                                                                                                               |
|------------------------------------------------------------|------------------------------------------------------------------------------------------------------------------|--------|----------------------------------------------------------------------------|---------------------|-----------------------------------------------------------------------------------------------------------------------|--------------------------------------------------------------------------------------------------------------------------------------------------------------------------------------------------------------------------------------------------------------------------------------------------------------------------------------------------------------------------------------------------------------------------------|-------------------------------------------------------------------------------------------------------------------------------------------------------------------------------------------------------------------------------------------------------------------------------------------------------------------------------------------------------------------------------------------------------------------------------------------------------------------------------------------------------------------------------------------------------------------------------------------------------------------------------|
| Seigel et al., 2002<br>Nordic Journal of<br>Psychiatry     | Random sample of<br>Swedish adults<br><br>W only<br><br>Mean age = 20.2y<br>(SD = 1.8)<br><br>Age range = 18-23y | 726    | Defense-<br>Defeat<br>Model of<br>Behavior                                 | Retrospecti<br>ve   | Emotional problems,<br>including: perceived<br>negative stress (1 item),<br>nervousness (1 item),<br>sadness (1 item) | Change in exercise due<br>to stress (1 item)<br><br>“Usually, does your<br>drive or need to be<br>physically active change<br>during periods when<br>you are significantly<br>worried about<br>something?”<br><br>Responses included: “It<br>increases; It decreases;<br>No change”.<br><br>3-category respondent<br>classification:<br>“behavioral<br>activation”,<br>“behavioral inhibition”<br>and “behavior<br>unchanged”. | The majority of the sample (60.1%) reported an unchanged drive to<br>activity during emotional stress, or was classified as “behavior<br>unchanged”. Subjects classified as “behavioral activation” were 22.0%.<br>Subjects classified as “behavioral inhibition” were 16.5%. 1.4% of<br>sample did not respond to the question.<br><br>People with exercise “behavior unchanged” reported less stress than those<br>classified as “behavior activation” (p < .0001) and “behavioral inhibition”<br>(p < .001).<br><br>The same trend was observed for reports of “feeling hurried”,<br>“nervousness” and “panicky feelings.” |
| Spillman, 1990<br><br>Psychological<br>Reports             | College students<br><br>M + W<br><br>Age range = 18-22y                                                          | 500    | None                                                                       | Cross-<br>sectional | Open question                                                                                                         | Open question                                                                                                                                                                                                                                                                                                                                                                                                                  | For 310 students, exercise used to cope with stress. Higher exercise<br>during times of stress.<br><br>More women students reported that exercise was used most often as an<br>alleviator for stress compared to men (significant).<br><br>This was a study of exercise coping.                                                                                                                                                                                                                                                                                                                                               |
| Sternfeld, 2000<br><br>American Journal<br>of Epidemiology | Multi-ethnic sample<br>of adults<br><br>W only<br><br>Age range = 40-55y                                         | 13,621 | None                                                                       | Cross-<br>sectional | PSS-4                                                                                                                 | Single global question<br>asking women to<br>compare exercise habits<br>to other women their<br>own age (validated<br>item)                                                                                                                                                                                                                                                                                                    | Women with a high quality of life and lower stress levels were mainly<br>found in the higher activity categories.<br>Women with low quality of life and higher stress levels were mainly<br>found in the lower activity categories.                                                                                                                                                                                                                                                                                                                                                                                           |
| Strine, 2004<br><br>Preventive<br>Medicine                 | Adults with heart<br>disease from BRFSS<br>dataset<br><br>M + W<br><br>Age > 45y                                 | 3,557  | Psychologi<br>cal stress<br>and the<br>incidence<br>of coronary<br>disease | Cross-<br>sectional | Single item: Number of<br>days in last month with<br>poor mental health<br>(including stress,<br>depression)          | BRFSS exercise<br>questions. Physical<br>inactivity (no activity).<br>Considered active if<br>insufficiently active or<br>more (moderate or<br>vigorous activity).                                                                                                                                                                                                                                                             | Adults with Fibromuscular Dysplasia were more likely to be physically<br>inactive and be obese.<br><br>Frequent mental distress was associated with only physical inactivity.                                                                                                                                                                                                                                                                                                                                                                                                                                                 |

|                                                |                                                                                                                |       |                                              |                 |                                                                                       |                                                                                                                                                                          |                                                                                                                                                                                                                                                                                                                                                                                                                                                                                                                                                                  |
|------------------------------------------------|----------------------------------------------------------------------------------------------------------------|-------|----------------------------------------------|-----------------|---------------------------------------------------------------------------------------|--------------------------------------------------------------------------------------------------------------------------------------------------------------------------|------------------------------------------------------------------------------------------------------------------------------------------------------------------------------------------------------------------------------------------------------------------------------------------------------------------------------------------------------------------------------------------------------------------------------------------------------------------------------------------------------------------------------------------------------------------|
| Tucker, 2012                                   | Nurses                                                                                                         | 2,247 | Health behavior                              | Cross-sectional | PSS-14                                                                                | HPLP II                                                                                                                                                                  | PSS and PA subscale correlated $-.28$ ( $p < .001$ ).<br>PSS predicted health behaviors ( $p < .001$ ).<br>$R^2$ for health behaviors regressed on PSS (alone) was 0.30.<br>**Personal communication June 28, 2012: The regression coefficient for PSS to predict physical activity was 0.026 (SE 0.002; $p < .001$ ), $R^2 = 8.3\%$ .                                                                                                                                                                                                                           |
| Journal of Nursing Administration              | W only<br>Age range = 18-83y<br>Mean age = 42.5y (SD = 11.8)                                                   |       |                                              |                 |                                                                                       |                                                                                                                                                                          |                                                                                                                                                                                                                                                                                                                                                                                                                                                                                                                                                                  |
| van Loon, 2000                                 | Dutch workers                                                                                                  | 3,309 | Job strain                                   | Cross-sectional | Job strain Iso-strain (strain plus social isolation); Included as appendix            | Hours of PA per week in low, medium or high intensity PA. Respondents classified as low vs medium/high                                                                   | No association between those in the low PA category and job demands, job control, or job social support.                                                                                                                                                                                                                                                                                                                                                                                                                                                         |
| International Journal of Epidemiology          | M + W<br>Age range = 20-65y                                                                                    |       |                                              |                 |                                                                                       |                                                                                                                                                                          |                                                                                                                                                                                                                                                                                                                                                                                                                                                                                                                                                                  |
| Vernon, 2010                                   | First time mothers                                                                                             | 51    | Maternal stress and PA first year postpartum | Cross-sectional | PSI                                                                                   | 24-hour recall for weekday and weekend day. Selection of activity for each 30 min block. Rated by intensity. Ave hours of light, moderate and vigorous PA. See Figure 1. | Some betas are positive, indicating that there was a positive relationship between stress and PA.<br><br>Light PA: predicted by PSI subscales competence ( $B = -.122$ , 95% CI = $-.183, -.060$ , $p < .0001$ ), depression ( $B = .063$ , 95% CI = $.024, .102$ , $p = .002$ ) and child moodiness ( $B = .033$ , 95% CI = $.005, .062$ , $p = .024$ ). Model $R^2 = .48$ .<br><br>Moderate PA: predicted by PSI subscales competence ( $B = .127$ , 95% CI = $.068, .187$ , $p < .0001$ ), depression ( $B = -.065$ , 95% CI = $-.104, -.026$ , $p = .002$ ). |
| Women & Health                                 | W only<br>Mean age = 27.16y (SD = 4.88)                                                                        |       |                                              |                 |                                                                                       |                                                                                                                                                                          |                                                                                                                                                                                                                                                                                                                                                                                                                                                                                                                                                                  |
| Vitaliano, 1996a                               | Caregivers of spouses with Alzheimer's;                                                                        | 142   | Caregiving                                   | Case control    | Hassles and Uplifts Scale<br>Screen for Caregiver Burden<br>Hamilton Depression Scale | 10-item activity scale: freq per week, duration; dichotomized as active (at least 90 min of exercise per week) or inactive                                               | In women with no hormone replacement therapy, controls had more exercise than caregivers.<br><br>No difference for men.<br><br>The relationship between psychological and physiological distress exists both cross-sectionally and over time.                                                                                                                                                                                                                                                                                                                    |
| Journal of Gerontology: Psychological Sciences | Matched controls<br>M + W<br>Mean age (care giver) = 69.8y (SD = 7.4)<br>Mean age (control) = 69.1y (SD = 5.4) |       |                                              |                 |                                                                                       |                                                                                                                                                                          |                                                                                                                                                                                                                                                                                                                                                                                                                                                                                                                                                                  |



|                                                             |                                                                                                                                                            |       |                   |                 |                                                                                                  |                                                                                                                            |                                                                                                                                                                                                                                                                                                                                                                                  |
|-------------------------------------------------------------|------------------------------------------------------------------------------------------------------------------------------------------------------------|-------|-------------------|-----------------|--------------------------------------------------------------------------------------------------|----------------------------------------------------------------------------------------------------------------------------|----------------------------------------------------------------------------------------------------------------------------------------------------------------------------------------------------------------------------------------------------------------------------------------------------------------------------------------------------------------------------------|
| Vitaliano, 1996b<br>Psychology and Aging                    | Caregivers of spouses with Alzheimer's;<br>Matched controls<br>M + W<br>Mean age (care givers) = 69.8y (SD = 8.0)<br>Mean age (control) = 69.1y (SD = 5.6) | 167   | Caregiving        | Case control    | Dimensions of Stress – control scale<br>Screen for Caregiver Burden<br>Hamilton Depression Scale | 10-item activity scale: freq per week, duration; dichotomized as active (at least 90 min of exercise per week) or inactive | Women controls exercise much more than women caregivers, thus women caregivers are at a greater risk for obesity.<br>No difference for men.                                                                                                                                                                                                                                      |
| Von Ah, 2004<br>Journal of Advanced Nursing                 | Convenience sample of undergraduate psychology students<br>M + W<br>Mean age = 19.7y (SD = 4.09)                                                           | 161   | Health behavior   | Cross-sectional | PSS-10                                                                                           | BRFSS PA and nutrition items (13 items)                                                                                    | No relationship between stress and PA.                                                                                                                                                                                                                                                                                                                                           |
| Vuori, 1994<br>Work & Stress                                | Population sample of adults<br>M + W<br>Age range = 31-44y                                                                                                 | 706   | Health behavior   | Cross-sectional | Occupational Stress Questionnaire                                                                | 1 item, 5-point Likert scale                                                                                               | No relationship with job demands ( $r = -.02, .08$ ).<br>Correlation with job control ( $r = -.13, -.14; p < .05$ ).<br>Not significant in path analysis.                                                                                                                                                                                                                        |
| Wemme, 2005<br>Journal of Epidemiology and Community Health | Currently employed adults in Sweden<br>M + W<br>Mean age (M) = 41.99 (SD = .19)<br>Mean age (W) = 42.15 (SD = .2)                                          | 7,169 | Job strain        | Cross-sectional | Karasek scale; daily stress level (1 item); economic stress (1 item)                             | Leisure PA: 1 item multiple choice question; respondents classified as low PA or not (binary)                              | Men more likely to be inactive were classified as having job strain (OR = 1.5, 95% CI = 1.1, 2.0), high daily stress (OR = 1.8, 95% CI = 1.5, 2.2), and in economic distress (OR = 2.3, 95% CI = 1.7, 3.0).<br>Men more likely to be inactive were classified as having high daily stress (OR = 1.2, 95% CI = 1.0, 1.5), and in economic distress (OR = 1.6, 95% CI = 1.2, 2.2). |
| Wijndaele, 2007<br>Psychology of Sport and Exercise         | Flemish adults<br>M + W<br>Age range = 18-75y                                                                                                              | 2,616 | Stress and coping | Cross-sectional | PSS-10<br>Utrecht Coping List<br>Symptom checklist (anxiety and depression)                      | Flemish Physical Activity Computerized Questionnaire                                                                       | Sports participation but not other types of leisure time physical activity was significantly lower in the stressed cluster.                                                                                                                                                                                                                                                      |

|                                           |                                                                                                                 |       |                                        |                 |                                                                                                                         |                                                                                                        |                                                                                                                                                                                                                                                                                                                                                                                                                                                                                                                                                                                                                                                                                                                                                                |
|-------------------------------------------|-----------------------------------------------------------------------------------------------------------------|-------|----------------------------------------|-----------------|-------------------------------------------------------------------------------------------------------------------------|--------------------------------------------------------------------------------------------------------|----------------------------------------------------------------------------------------------------------------------------------------------------------------------------------------------------------------------------------------------------------------------------------------------------------------------------------------------------------------------------------------------------------------------------------------------------------------------------------------------------------------------------------------------------------------------------------------------------------------------------------------------------------------------------------------------------------------------------------------------------------------|
| Wilcox, 2003<br>Journal of Gerontology    | Southern, Rural, white and African American older adults<br>W only<br>Age range > 50y                           | 102   | Elderly PA                             | Cross-sectional | Single item inquiring about magnitude of stress in last two weeks (0 to 3) from NHIS survey, no validity data available | PA Scale for the elderly (PASE)                                                                        | Stress correlated to more PA ( $r = .22$ ).<br>Stress explains model ( $\beta = .20$ , $p = .06$ ; non significant trend).                                                                                                                                                                                                                                                                                                                                                                                                                                                                                                                                                                                                                                     |
| Wu, 2000<br>Journal of Aging & Health     | White and blue-collar workers<br>M + W<br>Age range = 51-61y                                                    | 6,433 | Job stress/strain                      | Cross-sectional | Single item (1-4 scale)                                                                                                 | Categorical frequency items for light and vigorous PA                                                  | Blue-collar workers reporting more stress were more likely engage in vigorous PA.<br>White-collar workers experiencing more stress were less likely to report light PA.<br>Job type/status                                                                                                                                                                                                                                                                                                                                                                                                                                                                                                                                                                     |
| Yusuf, 1996<br>Archives Internal Medicine | Older Adults<br>M + W<br>Age range > 65y                                                                        | 7,801 | Elderly LTPA                           | Cross-sectional | Single item: amount of stress experienced (in the last two weeks): none to moderate or a lot                            | Dichotomous: doing 1 or more activity at least 30 minutes 3 days a week (for the past two weeks)       | M: Odds of exercising in last two weeks greater in people with "none to moderate stress" OR = 1.7 (95% CI = 1.2-2.4, adjusted for other variables).<br>W: Odds of exercising in last two weeks greater in people with "none to moderate stress" OR = 1.3 (95% CI = 1.0-1.6 adjusted for other variables).                                                                                                                                                                                                                                                                                                                                                                                                                                                      |
| Zen, 2012<br>Health Psychology            | Adults with CVD, 9% with PTSD<br>M + W<br>Mean age (PTSD) = 61y (SD = 11)<br>Mean age (no PTSD) = 67y (SD = 11) | 1,022 | PSTD relation to poor health behaviors | Cross-sectional | Computerized Diagnostic Interview Schedule for DSM-IV                                                                   | Five items: frequency, frequency of varying intensities of exercise, normative question about activity | PTSD was associated with significantly high rates of physical inactivity compared to others of their age and gender.                                                                                                                                                                                                                                                                                                                                                                                                                                                                                                                                                                                                                                           |
| Zunker, 2008<br>Women & Health            | African American adults at worksites<br>W only<br>Mean age = 44y                                                | 29    | Barriers                               | Qualitative     | Four nominal group technique sessions were held to gather input on job factors and daily life                           | Four nominal group technique sessions were held where they discussed barriers to PA                    | In response to physical activity, the primary themes included lack of time to exercise, stress of multiple family roles and responsibilities, and perceived physical barriers to physical activity.<br>Furthermore, many women expressed their concerns over dealing with stress at work and managing their time efficiently. Several women typically responded to work-related stress by overeating, making poor food choices, and avoiding physical activity. Other co-workers and the workplace culture generally supported this stress response. For example, it was the social norm to go out for lunch at a nearby fast food restaurant that had few healthy menu options or to take the elevator at work, even though the building had only two floors. |

---

<sup>a</sup>The study by Ho et al. (2002) is both retrospective and prospective and is included in Table 2.

**BMI** = body mass index, **BRFSS** = Behavioral Risk Factor Surveillance System, **CDC** = Center for Disease Control, **CES-D** = Center for Epidemiological Studies-Depression, **CI** = confidence interval, **CHD** = Coronary Heart Disease, **CVD** = Cardiovascular Disease, **DSM-IV** = Diagnostic and Statistical Manual, fourth edition, **DUR** = duration, **ES** = effect size, **FIW** = family interference with work, **FREQ** = frequency, **GHQ** = general health questionnaire, **HPLP** = Health Promoting Lifestyle Profile, **IES** = Impact of Event Scale, **LTPA** = leisure time physical activity, **M** = men, **METS** = metabolic equivalents, **MVPA** = moderate to vigorous physical activity, **NAIA** = National Association of Intercollegiate Athletics, **NCAA** = National Collegiate Athletic Association, **NHIS** = National Health Interview Survey, **OR** = odds ratio, **PA** = physical activity, **POMS** = profile of mood state, **PSI** = Parent Stress Index, **PSS** = Perceived Stress Scale, **PTSD** = Post Traumatic Stress Disorder, **Q** = questionnaire, **QR** = Quality Assessment Rating (1-9 scale; see text), **SCID** = Structured Clinical Interview for DSM Disorders, **SD** = standard deviation, **SE** = standard error, **SEM** = structural equation modeling, **W** = women, **WIF** = work interference with family

---

**Appendix 3.** Summary of studies exploring relationships between stress and indices of physical activity (PA) and exercise <sup>a</sup>

|                                   | n  | Inverse association <sup>b</sup> |       | No association <sup>c</sup> |      | Positive association <sup>d</sup> |      |
|-----------------------------------|----|----------------------------------|-------|-----------------------------|------|-----------------------------------|------|
|                                   |    | n                                | %     | n                           | %    | n                                 | %    |
| <b>Gender</b>                     |    |                                  |       |                             |      |                                   |      |
| Men                               | 2  | 1                                | 50.0  | 0                           | 0.0  | 1                                 | 50.0 |
| Women                             | 14 | 9                                | 64.3  | 4                           | 28.6 | 2                                 | 14.3 |
| Both genders                      | 39 | 32                               | 82.1  | 4                           | 10.3 | 7                                 | 17.9 |
| Total                             | 55 | 42                               | 76.4  | 8                           | 14.5 | 10                                | 18.2 |
| <b>Age<sup>e</sup></b>            |    |                                  |       |                             |      |                                   |      |
| < 17y                             | 3  | 2                                | 66.7  | 1                           | 33.3 | 0                                 | 0.0  |
| 18 - 29y                          | 12 | 8                                | 66.7  | 2                           | 16.7 | 3                                 | 25.0 |
| 30 - 49y                          | 19 | 13                               | 68.4  | 3                           | 15.8 | 3                                 | 15.8 |
| > 50y                             | 10 | 8                                | 80.0  | 2                           | 20.0 | 0                                 | 0.0  |
| All adult ages                    | 10 | 10                               | 100.0 | 0                           | 0.0  | 4                                 | 40.0 |
| Total                             | 54 | 41                               | 75.9  | 8                           | 14.8 | 10                                | 18.5 |
| <b>Clinical population status</b> |    |                                  |       |                             |      |                                   |      |
| Healthy                           | 47 | 36                               | 76.6  | 7                           | 14.9 | 8                                 | 17.0 |
| Clinical                          | 8  | 6                                | 75.0  | 1                           | 12.5 | 2                                 | 25.0 |
| Total                             | 55 | 42                               | 76.4  | 8                           | 14.5 | 10                                | 18.2 |
| <b>Subject Pool</b>               |    |                                  |       |                             |      |                                   |      |
| Employees                         | 19 | 14                               | 73.7  | 2                           | 10.5 | 5                                 | 26.3 |
| All others                        | 36 | 28                               | 77.8  | 6                           | 16.7 | 5                                 | 13.9 |
| Total                             | 55 | 42                               | 76.4  | 8                           | 14.5 | 10                                | 18.2 |
| <b>Sample Size</b>                |    |                                  |       |                             |      |                                   |      |
| Small (n < 100)                   | 22 | 15                               | 68.2  | 6                           | 27.3 | 2                                 | 9.1  |
| Large (n > 100)                   | 33 | 27                               | 81.8  | 2                           | 6.1  | 8                                 | 24.2 |
| Total                             | 55 | 42                               | 76.4  | 8                           | 14.5 | 10                                | 18.2 |
| <b>Study Quality</b>              |    |                                  |       |                             |      |                                   |      |

|       |    |    |      |   |      |    |      |
|-------|----|----|------|---|------|----|------|
| < 7   | 20 | 12 | 60.0 | 5 | 25.0 | 4  | 20.0 |
| > 7   | 35 | 30 | 85.7 | 3 | 8.6  | 6  | 17.1 |
| Total | 55 | 42 | 76.4 | 8 | 14.5 | 10 | 18.2 |

<sup>a</sup> Some studies provide evidence of multiple associations between stress and indices of PA resulting in support for more than one direction of the association, which explains why totals may exceed 100.0%.

<sup>b</sup> Studies demonstrating at least one inverse relationship between indicators of stress and PA.

<sup>c</sup> Studies demonstrating no relationships between indicators of stress and PA.

<sup>d</sup> Studies demonstrating at least one positive relationship between indicators of stress and PA.

<sup>e</sup> Hooper et al., 1995, did not report age.
